# Supplementary material
Source: PubMed Central journal article supplement (PMC10272089)
Supplement: NIHMS1878650-supplement-9.pdf [file NIHMS1878650-supplement-9.pdf]

## SPOTS (Spatial PRotein and Transcriptome Sequencing) Workflow

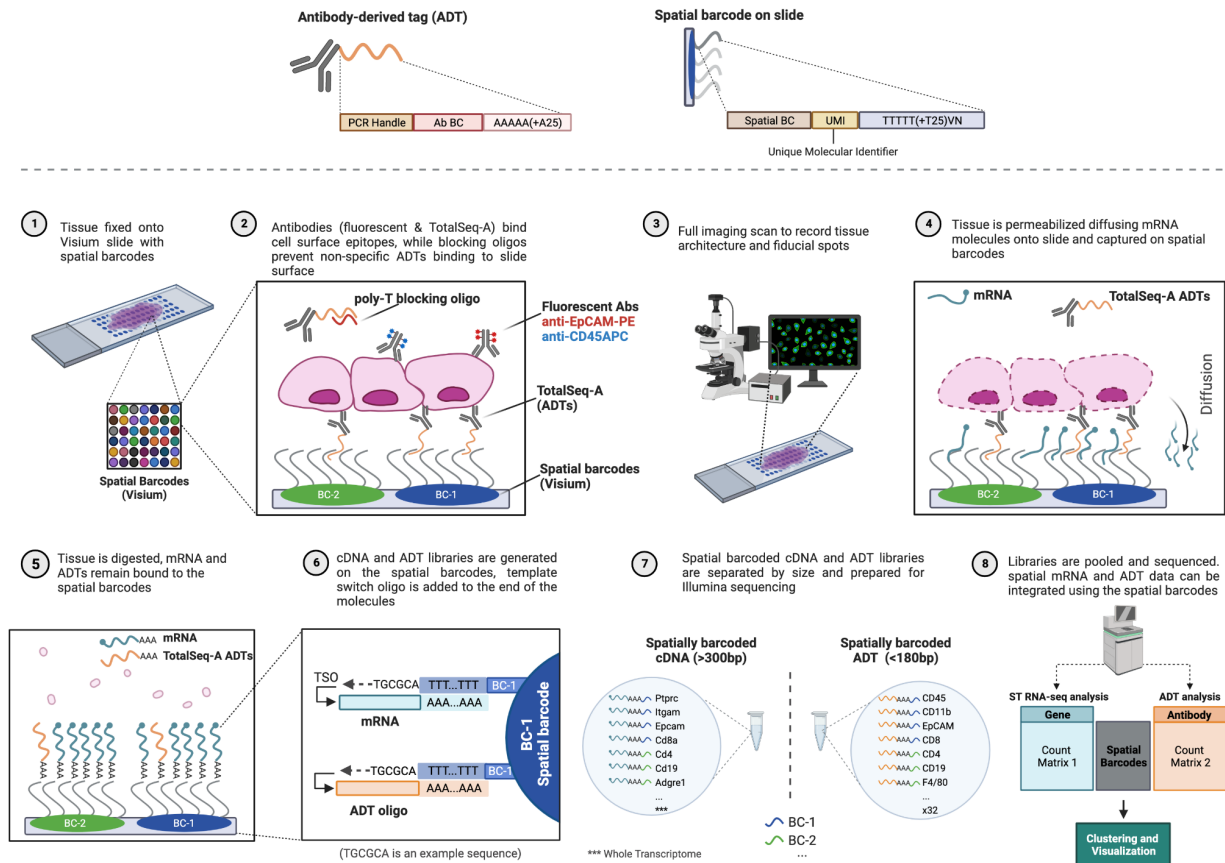

### Supplementary Figure 1: Workflow schematic of SPOTS

**(Step 1)** Tissue sections are mounted onto Visium slide, fixed for 10 min, and immunostained **(Step 2)** with fluorescent and TotalSeq-A antibodies (same clones) for 90 min in the presence of poly-T blocking oligos that prevent non-specific ADTs binding to slide surface. After washes, tissue is scanned under a scanning microscope to capture the tissue structure and fiducial spots **(Step 3)**. The tissue is then permeabilized **(Step 4)**, and RNA diffuses onto the poly-T oligos on the spatial barcodes. Following tissue digestion **(Step 5)**, and template switched RT-PCR **(Step 6)**, gene expression and ADT libraries are generated to preserve associated spatial barcodes and RNA sequence/ADT antibody barcodes **(Step 7)**. Gene expression and ADT libraries are sequenced, and data are integrated using our designated pipeline **(Step 8)**.

a

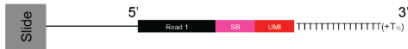

b

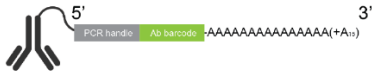

c

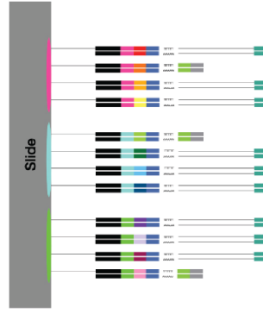

d

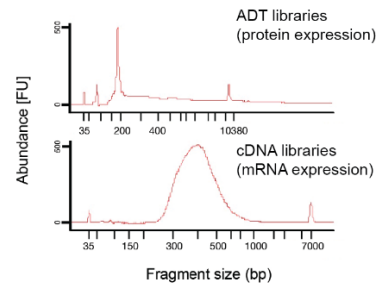

e

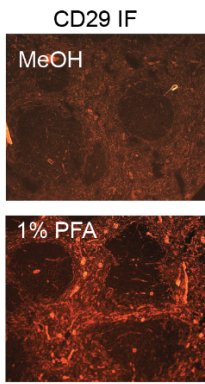

f

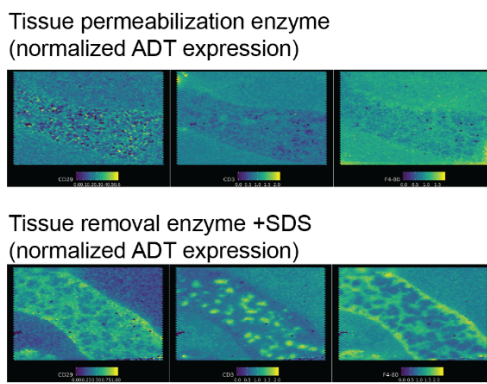

cDNA libraries (mRNA expression)

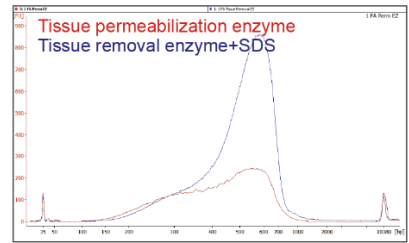

g

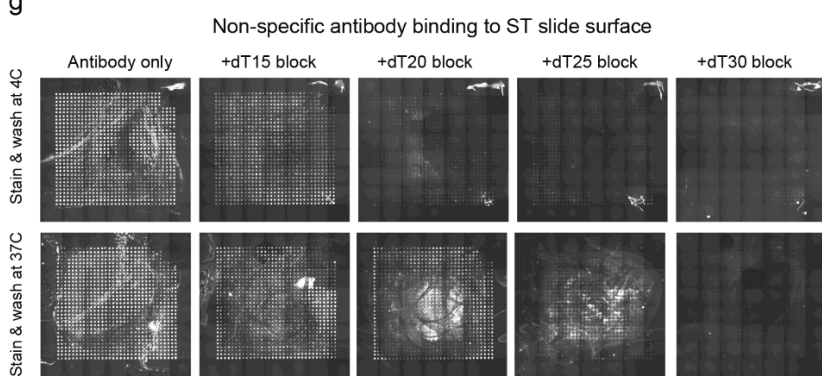

Dual tagged antibodies (ADT+fluorophore)

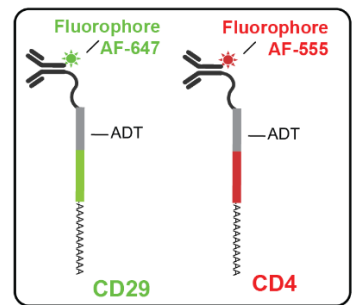

h

without poly-dT blocking aligos

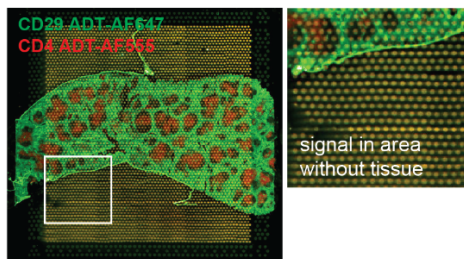

with poly-dT blocking aligos

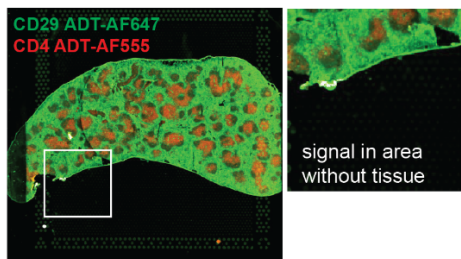

## **Supplementary Figure 2: SPOTS library preparation and optimizations.**

**(a)** Illustration of the structure of a barcoded oligo, including Read 1, spatial barcode (SB), unique molecular identifier (UMI), and poly-T ( $T_{30}$ ) sequences, attached to the Visium slide.

**(b)** Illustration of the structure of an ADT-conjugated antibody, including a PCR handle (Handle), an antibody barcode (AB), and poly-A ( $A_{30}$ ).

**(c)** Schematic of SPOTS following second strand synthesis. ADT and mRNA location is recorded through spatial barcodes on the Visium slide.

**(d)** After cDNA amplification, ADT and cDNA libraries can be separated and prepared for sequencing to produce indexed ADTs (top panel, BioA) and gene expression libraries (bottom panel, BioA).

**(e)** IF analysis using CD29 antibodies (TotalSeq-A clone) in spleen tissues that were fixed for 10 min at 25°C using 100% MeOH (top) or 1% PFA (bottom).

**(f)** Normalized ADT levels (left) and cDNA libraries (right, BioA) of indicated antibodies using tissue permeabilization vs. tissue removal enzyme and SDS.

**(g)** Poly-T blocking oligo length and wash temperature titration. Titration of different poly-T blocking oligo lengths and their ability to hinder binding of dual-tagged antibodies

(ADT+fluorophore) to poly-A surface probes at either 4°C or 37°C. Note the difference between the different temperatures for dT20.

**(h)** IF using dual-tagged antibodies (ADT+fluorophore) of CD29 (green) and CD4 (red) in mouse spleens in the presence or absence of 20µM poly-T blocking oligos. Note for reduction of non-specific bindings in tissue-free areas.

a

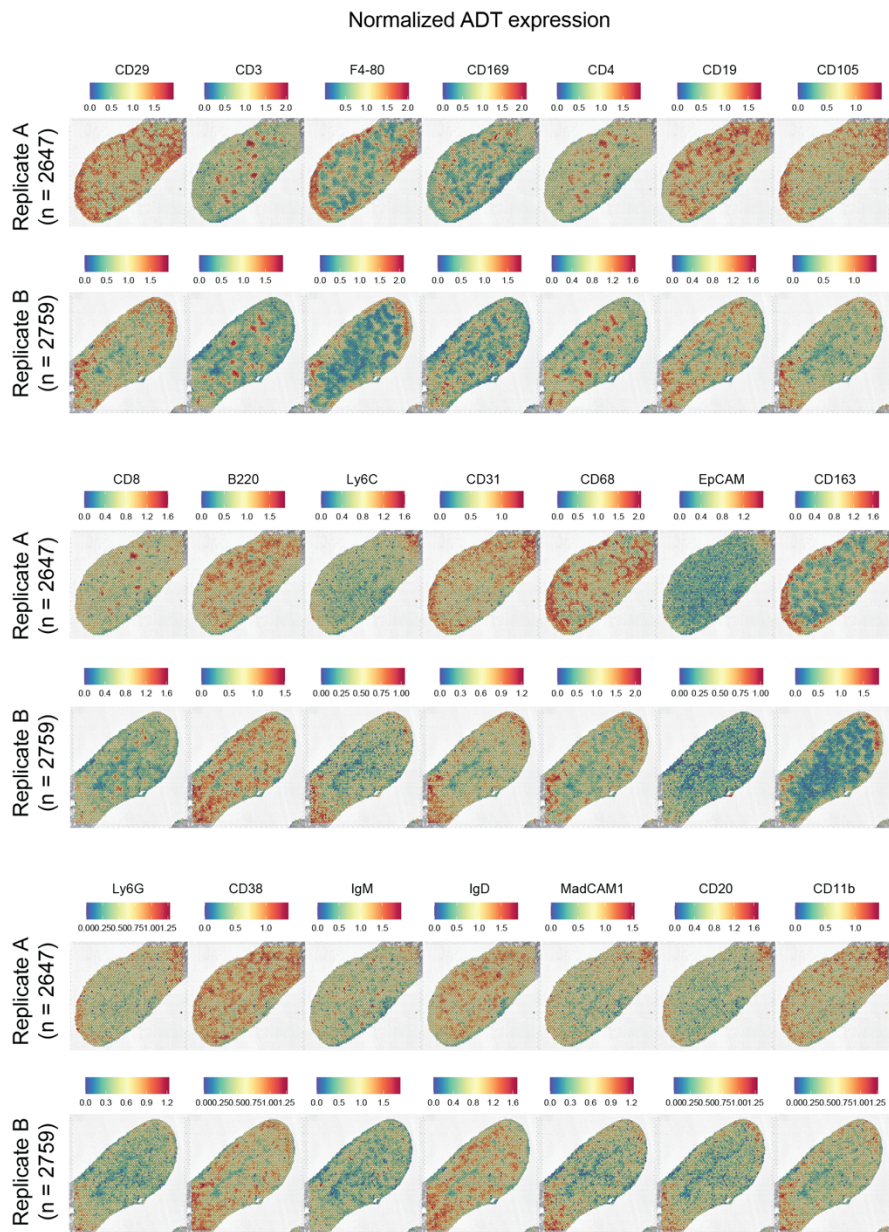

b

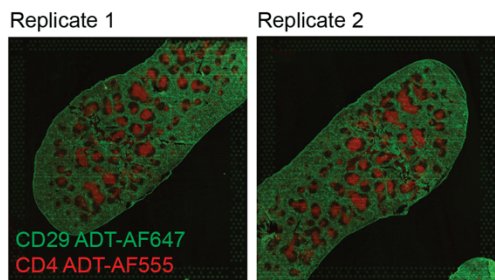

c

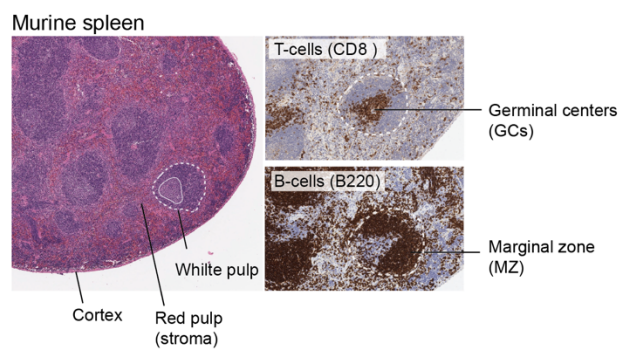

**Supplementary Figure 3: Normalized ADT levels in spleens.**

**(a)** Normalized ADT levels of all 21 surface proteins in two spleen samples.

**(b)** Immunofluorescence staining for CD29 (green) and CD4 (red) in spleen tissues from **a**, using fluorophore-ADT dual-tagged antibodies.

**(c)** Serial histological sections of mouse spleen (unstimulated) stained for H&E, B cells (B220), and T cells (CD8), demonstrating the typical spatial cell organization.

a

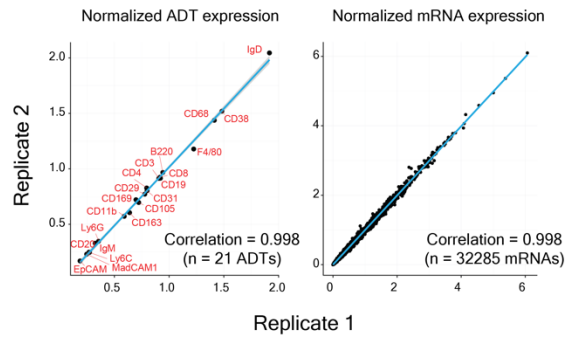

b

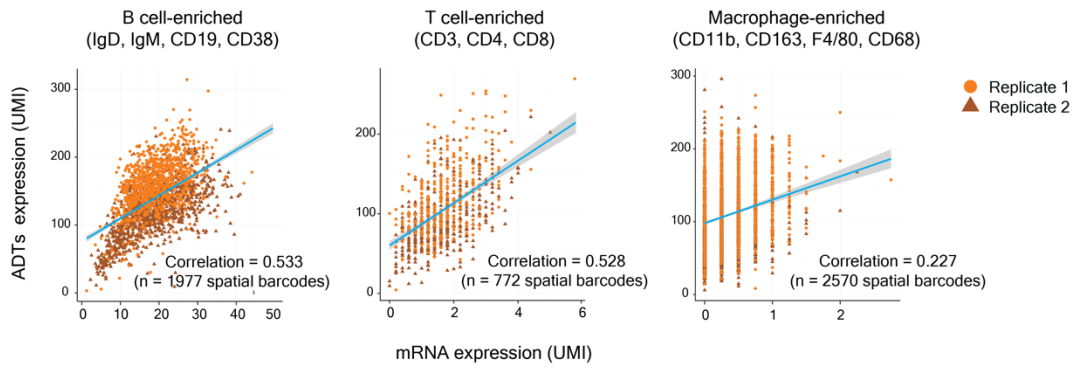

c

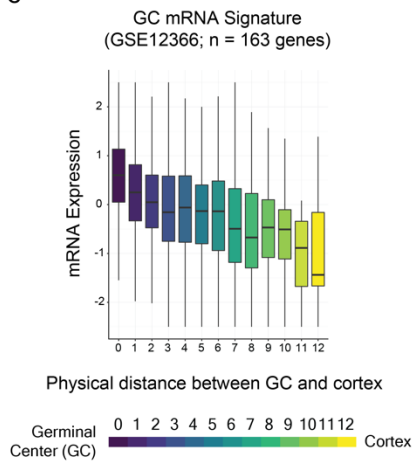

d

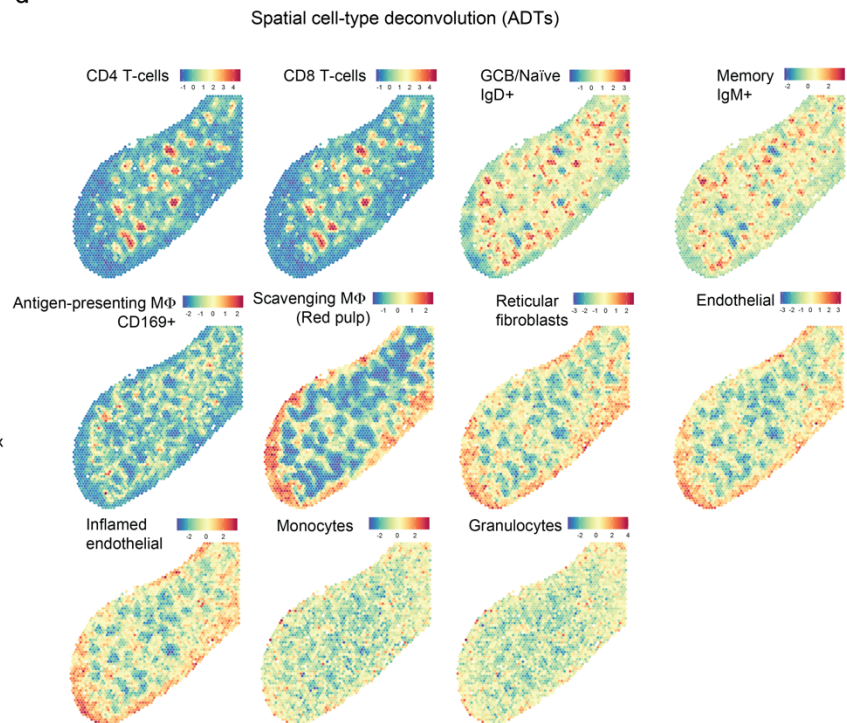

**Supplementary Figure 4: Reproducibility and quality controls of SPOTS spleen data.**

**(a)** Correlation of normalized ADT levels and mRNA expressions between two biological replicates of mouse spleen.

**(b)** Correlation between mRNA and different ADT levels (UMI) at single spatial barcode level for B cell, T cell, and macrophage enriched clusters across spatial barcodes in two biological replicates.

**(c)** Boxplot showing mRNA expression levels of germinal center (GC) specific genes (GSE12366; n = 163 genes) as a function of the distance from the center of GCs. The boxes were colored by the physical distance from the center of GCs as shown in **Fig. 1f**.

**(d)** Cell-type deconvolution based on ADTs (Z-score) of each spatial barcode overlaid onto the spleen tissue. Magnified areas are shown in **Fig. 1h**.

a

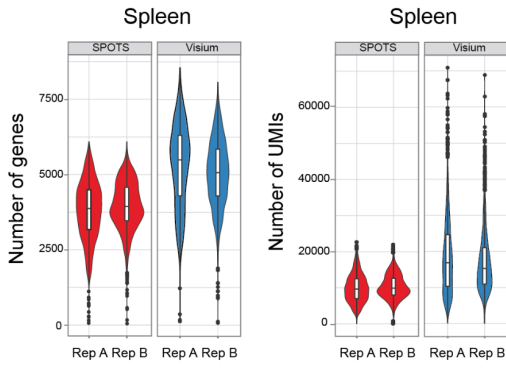

b

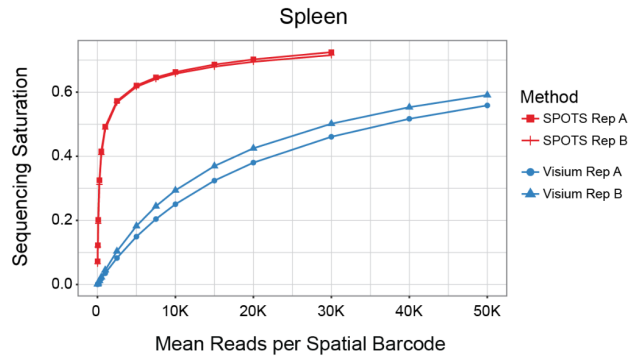

c

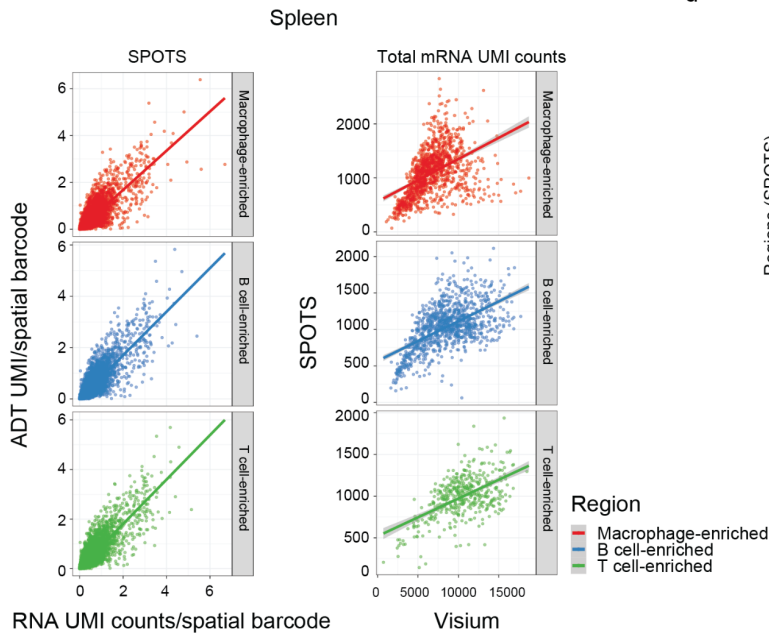

d

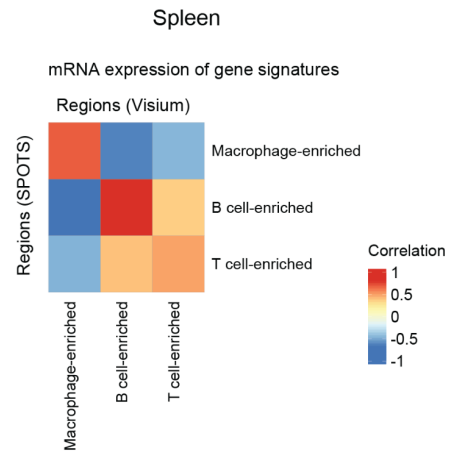



**Supplementary Figure 5: Comparative performance analysis between SPOTS and Visium alone in spleen**

**(a)** Total detected genes and UMIs across spatial barcodes in biological replicates of spleens using SPOTS or Visium alone (n=2 each). Sequencing depth: SPOTS rep A ~175K reads per spot, SPOTS rep B ~155K reads per spot, Visium rep A ~124K reads per spot, Visium rep B ~110K reads per spot.

**(b)** Sequencing saturation curves for RNA of the two replicates of mouse spleen using SPOTS or Visium alone.

**(c)** Correlation between mRNA and ADT UMI counts (left panel) in spleens using SPOTS. Correlation of total mRNA UMI counts in spatial barcodes using SPOTS (Y-axis) and Visium only (X-axis).

**(d)** Correlation of gene expression signatures in the indicated cell clusters as detected by SPOTS (Y-axis) and Visium alone (X-axis).

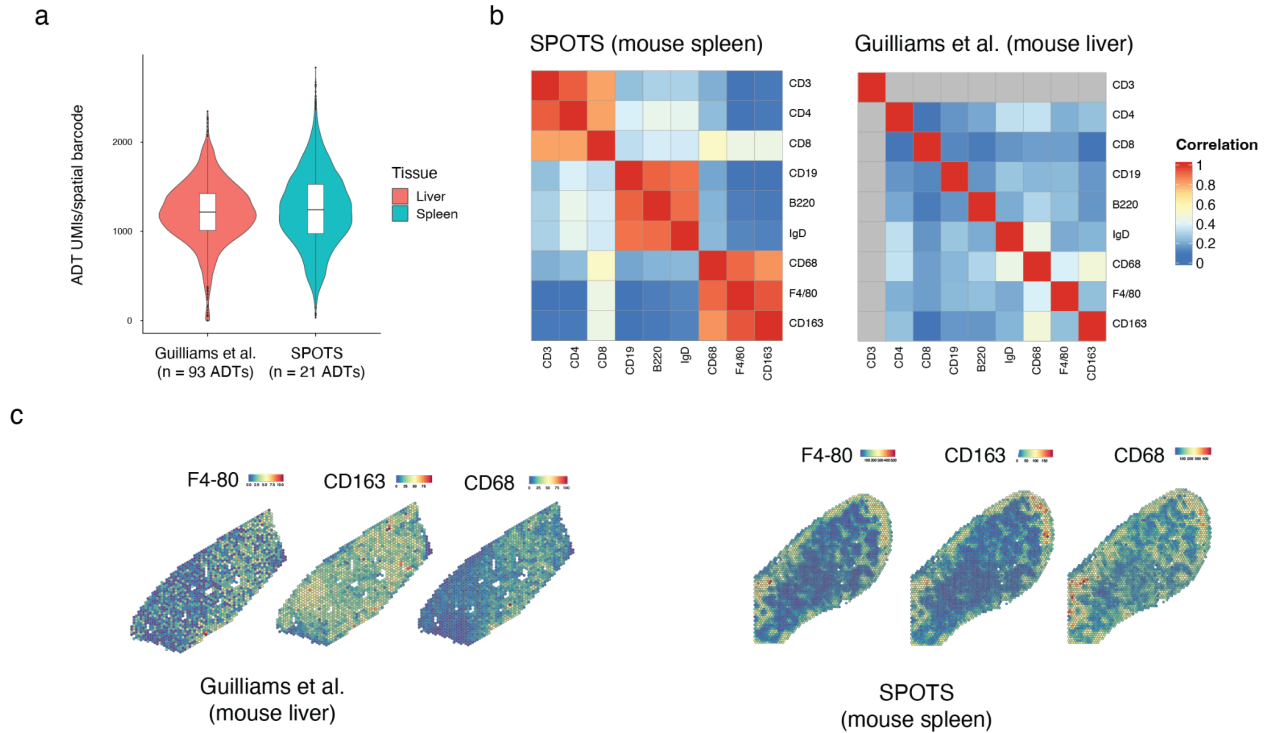

**Supplementary Figure 6: Performance comparison of SPOTS to Guilliams et al.**

**(a)** Total ADT UMI counts across the tissue spatial barcodes using 93 or 21 TotalSeq-A antibodies (Guilliams in mouse liver or SPOTS in mouse spleen, respectively).

**(b)** Correlation map between several ADT markers of the same cell type in mouse liver (Guilliams et al.) and mouse spleen (SPOTS). ADTs: T cells (CD8, CD4, CD3), B cells (CD19, B220, IgD), and macrophages (F4/80, CD68, CD163).

**(c)** Visualization of normalized ADTs of macrophages from panel b in liver (Guilliams et al.) and spleen (SPOTS).

**a**

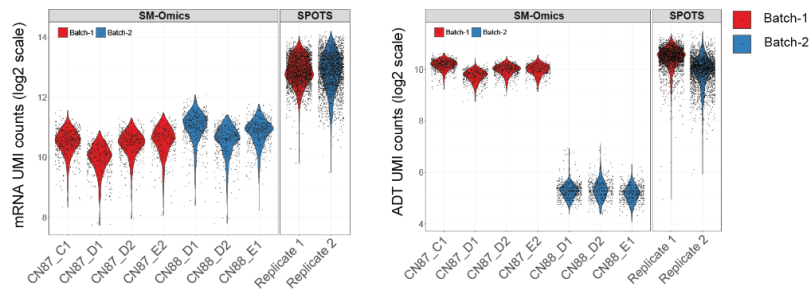

**b**

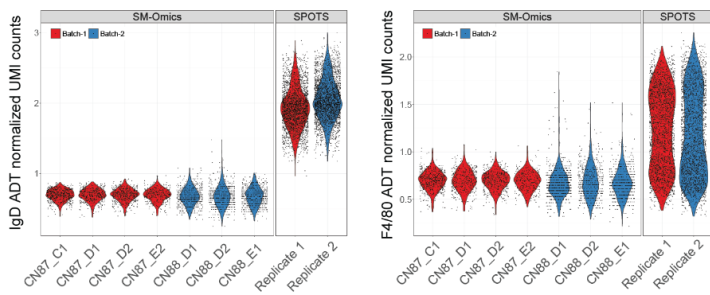

**c**

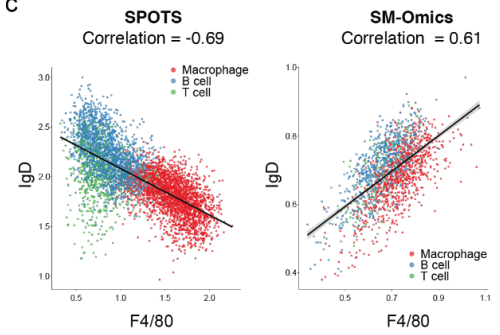

**d**

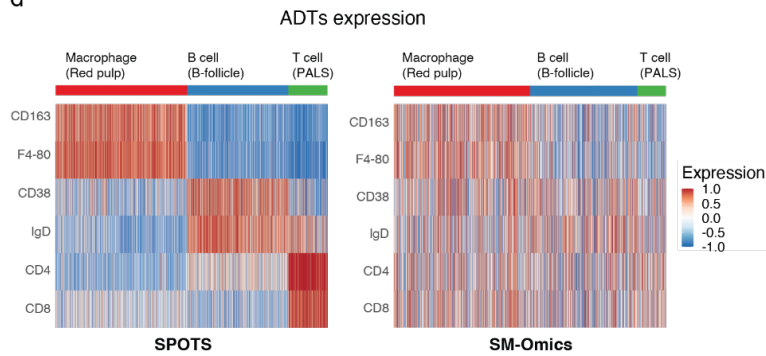

**e**

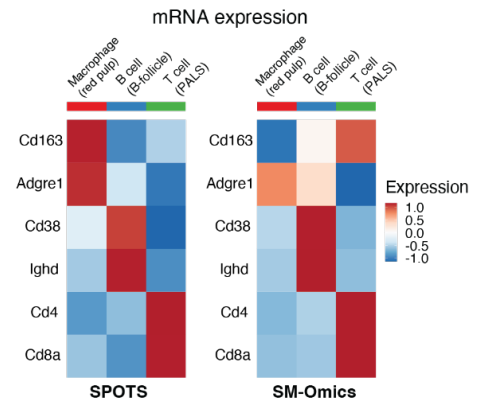

**f**

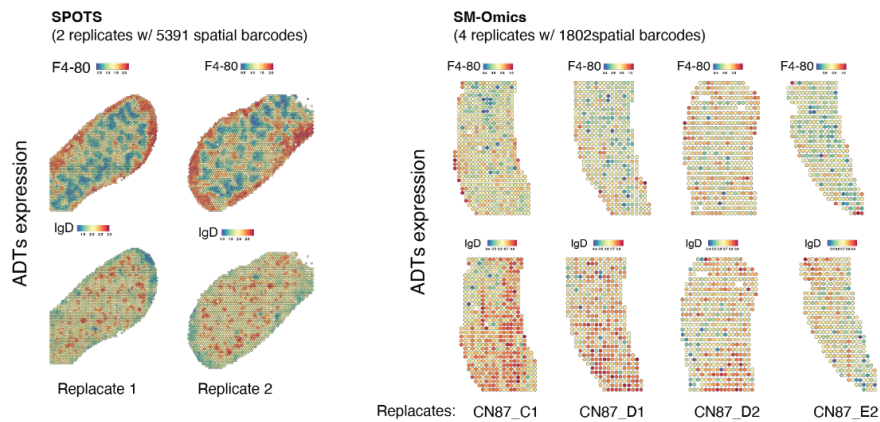

**Supplementary Figure 7: Performance comparison of SPOTS to SM-Omics.**

- (a) Total mRNA and ADT counts across spatial barcodes in biological replicates of spleens.
- (b) Total ADT counts of F4/80 (macrophages) and IgD (B cells) across biological replicates of spleens.
- (c) Correlations between IgD and F4/80 (normalized ADT counts) for each spatial barcode in splenic tissues by SPOTS and SM-Omics. Note the anti-correlation between F4/80+ macrophage-enriched (Red pulp) and IgD+ B cell-enriched (B follicle) regions in the SPOTS analyses.
- (d) Differentially expressed ADT levels (Z-score) for each cluster of spatial barcodes in splenic tissues. Left panel: SPOTS, right panel: SM-Omics
- (e) Heatmap showing differentially expressed mRNAs (Z-score) in each cluster of spatial barcodes in splenic tissues. Left panel: SPOTS, right panel: SM-Omics
- (f) Visualization of normalized ADT expression of macrophages (F4/80) and B-cells (IgD) in spleens using SPOTS (left) and SM-Omics (right).

a

IBA-1 IHC (Macrophages)

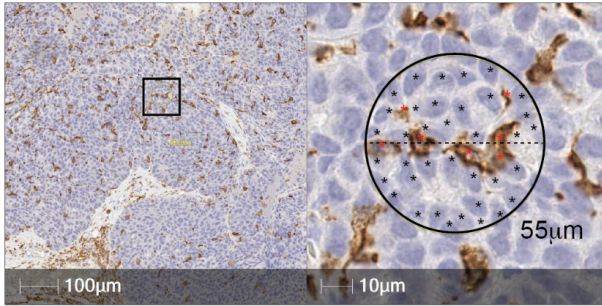

Macrophages abundance

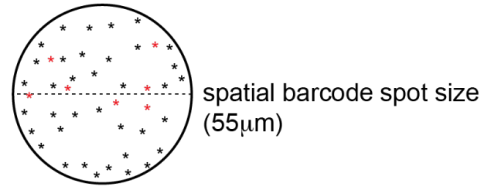

CD8 IHC (T-cells)

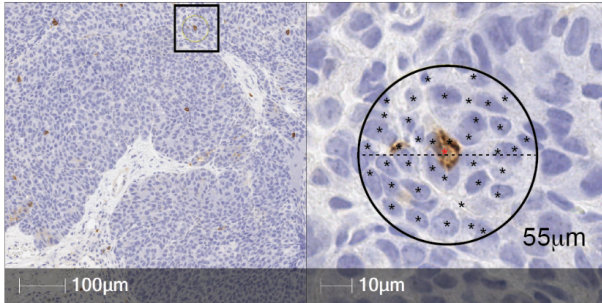

T-cells abundance

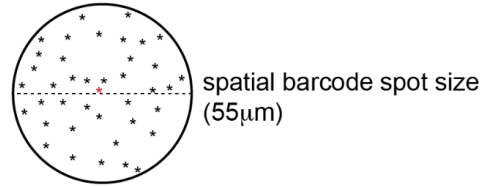

b

Tissue permeabilization methods  
(Breast cancer tissue; MMTV-PyMT model)

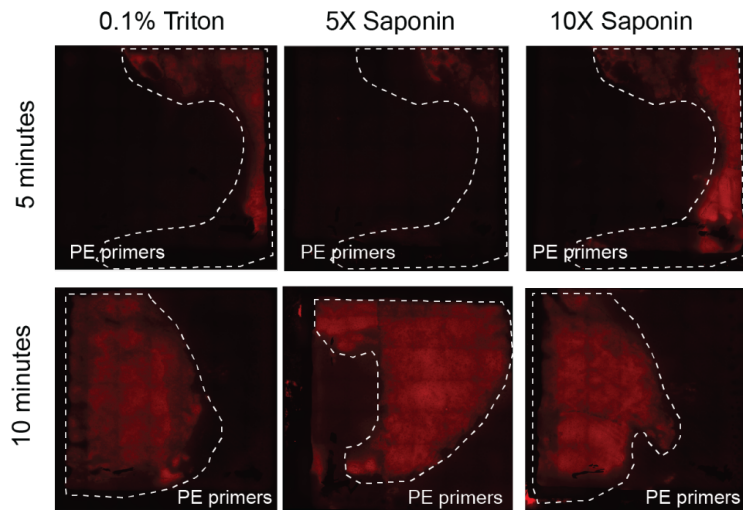

----- tissue outline

### **Supplementary Figure 8: Breast cancer tissue architecture and optimizations**

**(a)** Immunohistochemistry (IHC) analysis of CD8 (T cells) and IBA-1 (macrophages) in mammary tumor section from MMTV-PyMT model demonstrating the typical abundance of T cells and tumor-associated macrophages in breast tumors.

**(b)** Fluorescence imaging of TRITC labeled cDNA from mouse breast tumors following 5 or 10 minutes with 5X or 10X saponin or 0.1% Triton pre-staining permeabilization conditions. Dotted lines outline tissue borders.

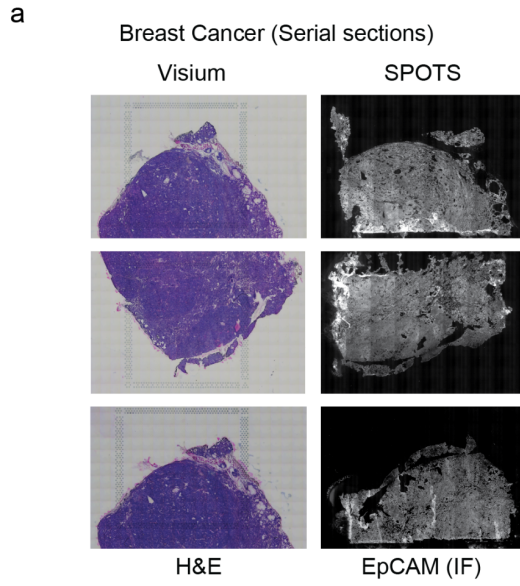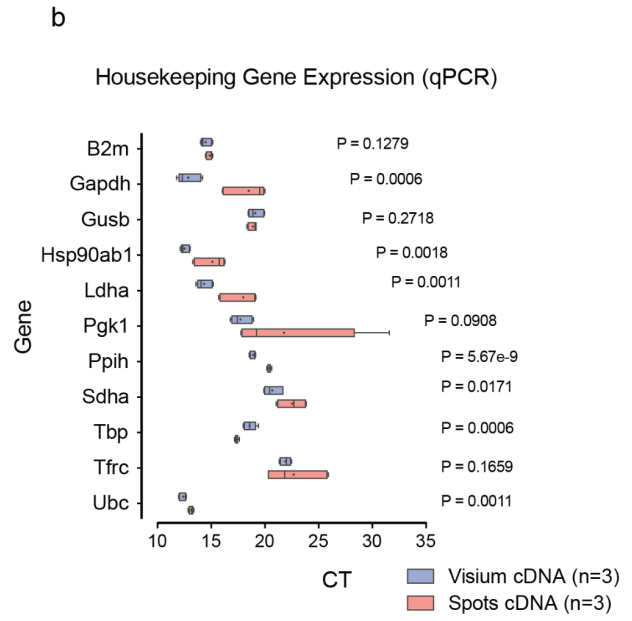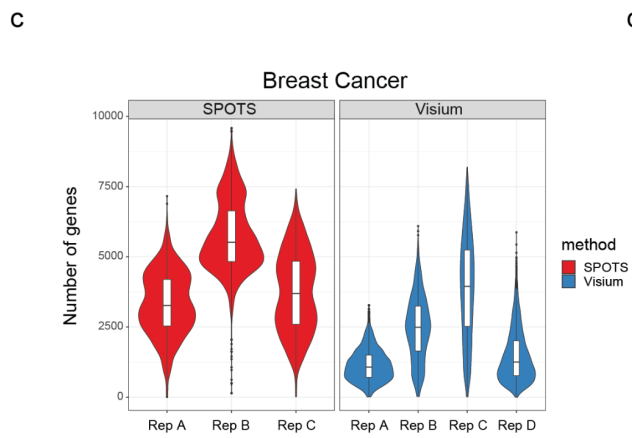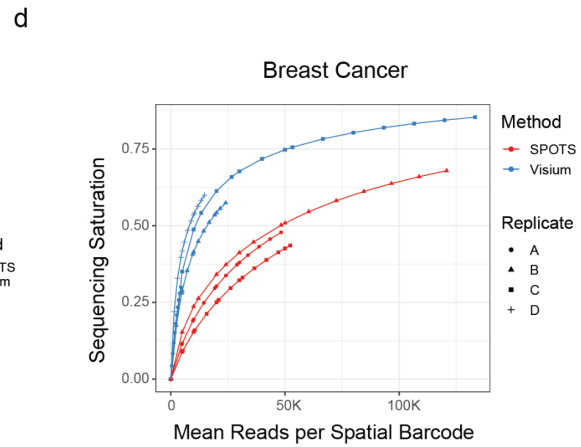

**Supplementary Figure 9: Gene expression analysis of housekeeping genes in SPOTS and Visium cDNA libraries and comparative performance analysis between SPOTS and Visium-alone in breast cancer tissue.**

**(a)** Images of serial sections of 3 biological replicates of mammary tumors using Visium protocol (H&E staining images) or SPOTS protocol (IF images of EpCAM).

**(b)** Gene expression cycle threshold (CT) values of the indicated housekeeping genes using cDNA generated by Visium or SPOTS protocols from **panel a**.

**(c)** Total detected genes across spatial barcodes in biological replicates of mammary tumors using SPOTS (n=3) or Visium alone (n=4). Sequencing depths for all Visium and SPOTS samples ~50K reads per spot.

**(d)** Sequencing saturation curves for RNA of the biological replicates from **panel c**.



a

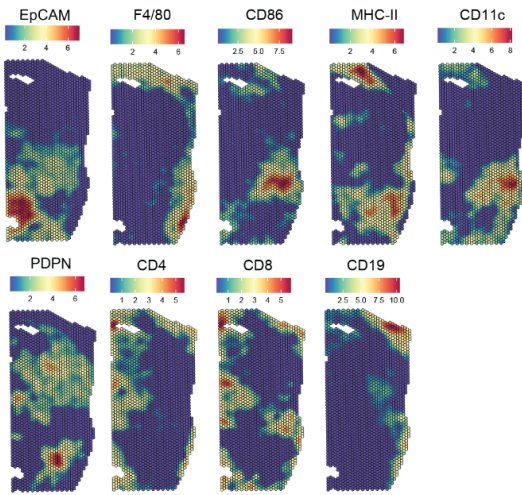

b

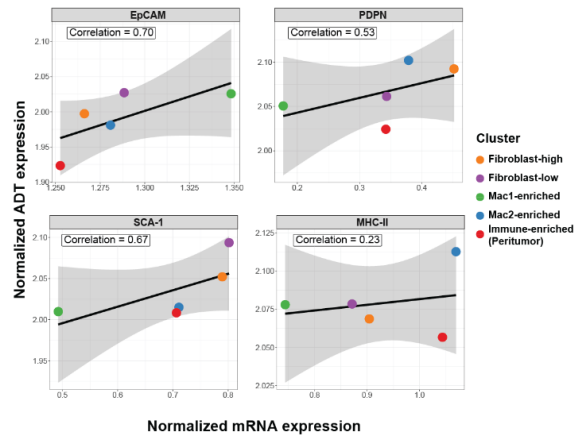

c

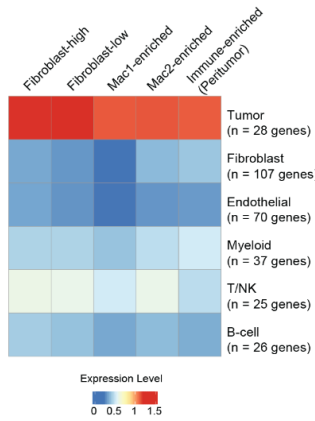

d

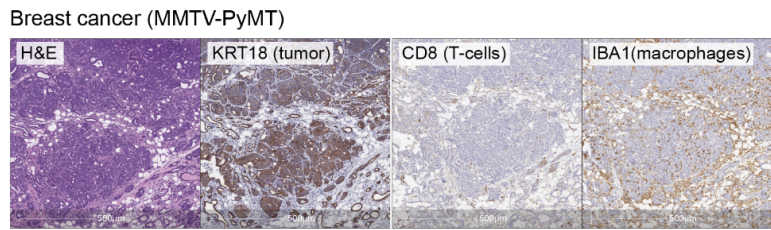

e

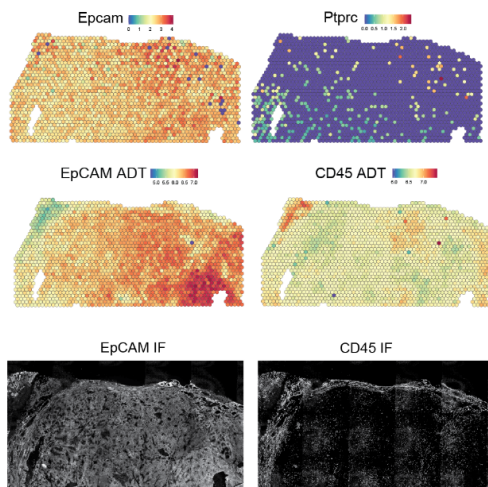

f

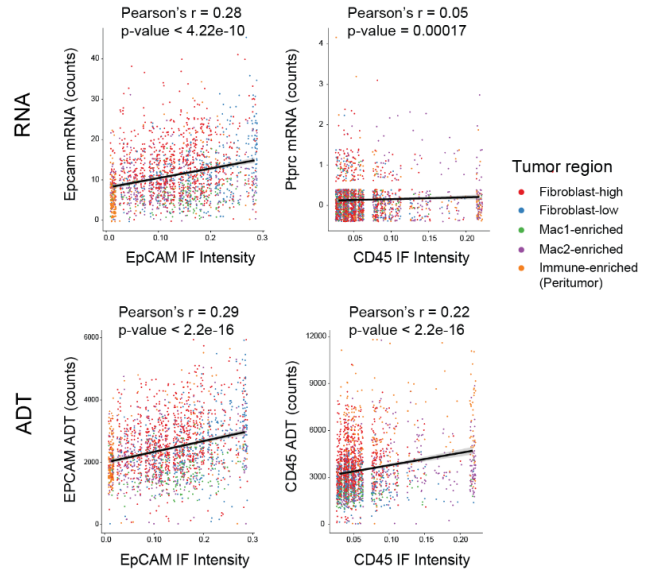

**Supplementary Figure 10: Spatial mRNA and ADT levels in breast cancer TME.**

**(a)** Normalized ADT levels (Z-score) of selected markers in a tissue section of MMTV-PyMT breast cancer.

**(b)** Correlation between normalized mRNA expression and ADT levels of the indicated surface markers (EpCAM, PDPN, SCA-1, MHC-II). Pearson's correlation coefficients were calculated on cluster level and are indicated in the boxed labels.

**(c)** Average normalized mRNA expressions of key cell-type marker genes (GSE158677) in each spatial cluster.

**(d)** H&E staining and IHC analysis of KRT18 (tumor cells), CD8 (T cells), and IBA1 (macrophages) in serial sections of the MMTV-PyMT breast cancer model, demonstrating the typical abundances of tumor cells, T cells, and macrophages in mammary tumors. Scale bar 500 $\mu$ m.

**(e)** Normalized mRNA and ADT expression levels of Epcam and Ptprc along with their corresponding IF signals in breast cancer tissue.

**(f)** Pearson's correlation analysis between total UMI mRNA or UMI ADT counts and IF intensities of the indicated genes across the spatial barcodes. Pearson's correlation coefficients are shown; mRNA/IF (top) and ADT/IF (bottom).

a

EpCAM MHC-II F4/80 DAPI

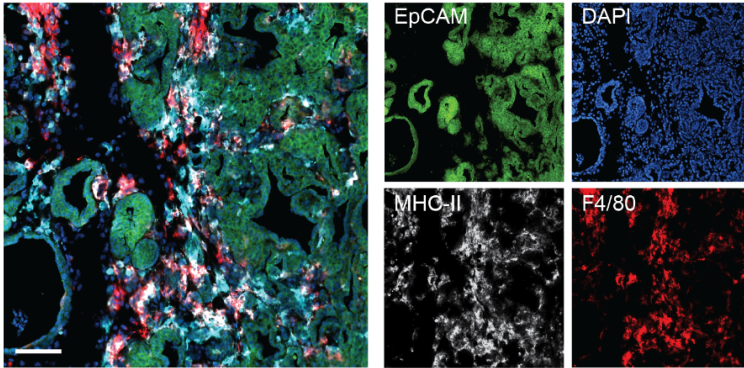

b

EpCAM MHC-II CCR2 DAPI

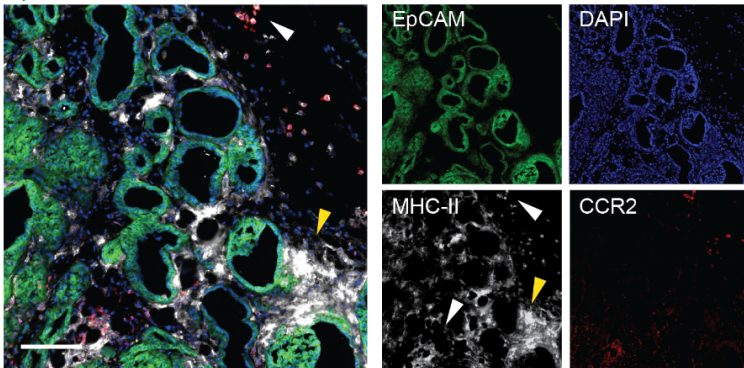

c

CD4 CD8 EpCAM DAPI

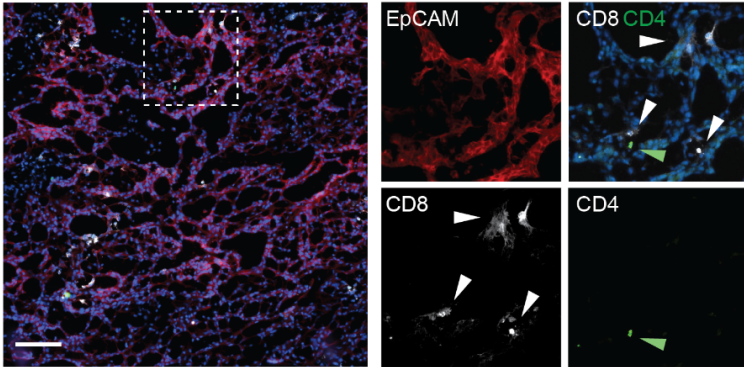

d

EpCAM CD31 DAPI

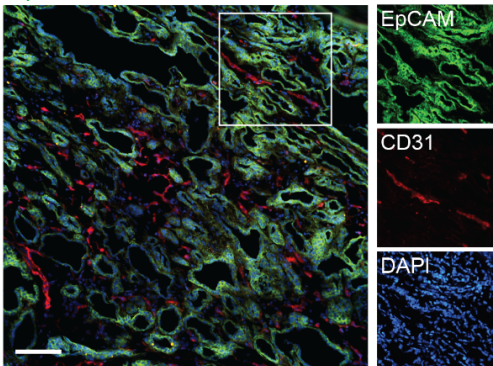

**Supplementary Figure 11: IF analysis using TotalSeq-A clones in breast cancer.**

**(a)** IF analysis of EpCAM and DAPI to visualize tissue architecture along with F4/80 and MHC-II to highlight tumor-associated macrophages (TAMs). Scale bar 500 $\mu$ m.

**(b)** IF analysis of EpCAM and DAPI to visualize tissue architecture along with CCR2 and MHC-II to highlight two populations of TAMs (MHC-II+ CCR2-/MHC-II+ CCR2+). Scale bar 500 $\mu$ m.

**(c)** IF analysis of EpCAM and DAPI to visualize tissue architecture along with CD4 and CD8 to mark the two populations of tumor-infiltrating T cells. Scale bar 500 $\mu$ m.

**(d)** IF analysis of EpCAM and DAPI to visualize tissue architecture and CD31 to visualize blood vessels. Scale bar 500 $\mu$ m.

## **Supplementary table legends**

**Supplementary Table 1.** ADT sequences, primers, and indices were used in this study.

**Supplementary Table 2.** Spleen metadata. **Tab 1:** Metadata for each spatial barcode of the spleen tissues. **Tab 2:** ADT deconvolution results for each spatial barcode of the spleen tissues.

**Tab 3:** Distance between the germinal centers and spleen cortex for each spatial barcode of the analyzed spleens.

**Supplementary Table 3.** Spleen differential expression analysis results. **Tab 1:** Differentially expressed ADTs in the spleen tissues. **Tab 2:** Differentially expressed mRNAs in the spleen tissues.

**Supplementary Table 4.** Breast cancer metadata. **Tab 1:** Metadata for each breast cancer spatial barcodes. **Tab 2:** ADT deconvolution results for each breast cancer spatial barcodes. **Tab 3:** Transcriptome deconvolution results for each breast cancer spatial barcodes. **Tab 4:** ADT and mRNA modality weights for each breast cancer spatial barcodes. **Tab 5:** EpCAM and CD45 immunofluorescent signal intensities for each breast cancer spatial barcodes.

**Supplementary Table 5.** Breast cancer differential expression analysis results. **Tab 1:** Differentially expressed ADTs in the breast cancer tissues. **Tab 2:** Differentially expressed mRNAs in the breast cancer tissues. **Tab 3:** GSE158977 differentially expressed genes. **Tab 4:** Differentially expressed genes between Mac1-enriched and Mac2-enriched regions in breast cancer tissue.
