# Supplementary material
Source: PubMed Central journal article supplement (PMC10272089)
Supplement: NIHMS1878650-supplement-Supp__Note_4.pdf [file NIHMS1878650-supplement-Supp__Note_4.pdf]

# Supplementary Note SPOTS analysis of murine spleen

Steve X. Niu<sup>1</sup>

Last Run: March 21, 2022

1. Load Data This markdown file contains the scRNA-seq analysis for the paper titled **Integrated protein and transcriptome high-throughput spatial profiling**. The data used for this analysis can be found under the GEO repository GSE198353.

```
# install Seurat v3.0.0
if (!requireNamespace("Seurat", quietly = TRUE) | utils::packageVersion("Seurat") < "4.0.0")
  remotes::install_version("Seurat", version = "4.0.0")

# load data
library(Seurat)
# replicate 1
rep_1_data <- Read10X_h5('spleen_rep_1_filtered_feature_bc_matrix.h5')
rep_1_image <- Read10X_Image('GSE198353_spleen_replicate_1_spatial')
rep_1 <- CreateSeuratObject(rep_1_data$`Gene Expression`, assay = "RNA", project = "Rep_1")
rep_1_CITE <- CreateSeuratObject(rep_1_data$`Antibody Capture`, assay = "CITE", project = "Rep_1")
rep_1@assays$CITE <- rep_1_CITE@assays$CITE
rep_1$nCount_CITE <- rep_1_CITE$nCount_CITE
rep_1$nFeature_CITE <- rep_1_CITE$nFeature_CITE
rep_1_image@assay <- c("RNA", "CITE")
rep_1_image@key <- "Rep_1"
rep_1@images <- list(Rep_1 = rep_1_image)
# replicate 2
rep_2_data <- Read10X_h5('spleen_rep_2_filtered_feature_bc_matrix.h5')
rep_2_image <- Read10X_Image('GSE198353_spleen_replicate_2_spatial')
rep_2 <- CreateSeuratObject(rep_2_data$`Gene Expression`, assay = "RNA", project = "Rep_2")
rep_2_CITE <- CreateSeuratObject(rep_2_data$`Antibody Capture`, assay = "CITE", project = "Rep_2")
rep_2@assays$CITE <- rep_2_CITE@assays$CITE
rep_2$nCount_CITE <- rep_2_CITE$nCount_CITE
rep_2$nFeature_CITE <- rep_2_CITE$nFeature_CITE
rep_2_image@assay <- c("RNA", "CITE")
rep_2_image@key <- "Rep_2"
rep_2@images <- list(Rep_2 = rep_2_image)
# merge
spleen <- merge(rep_1, rep_2, add.cell.ids = c("Rep_1", "Rep_2"), project = "Spleen")
SpatialDimPlot(spleen, images = c("Rep_1", "Rep_2"))
```

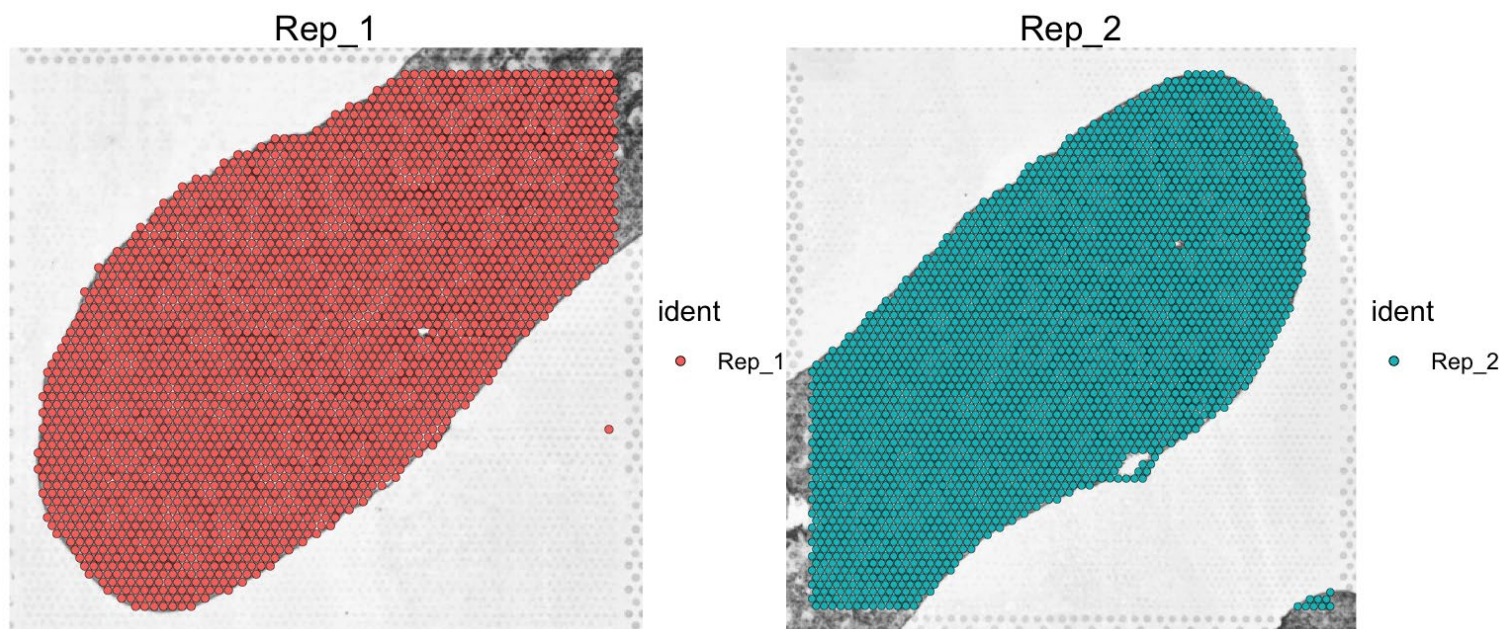

## 2. Data normalization

```
DefaultAssay(spleen) = "CITE"
spleen = NormalizeData(spleen, assay = "RNA", verbose = FALSE)
spleen = NormalizeData(spleen, normalization.method = "CLR", assay = "CITE", margin = 2, verbose = FALSE)
spleen <- ScaleData(spleen, verbose = FALSE)
p1 <- SpatialFeaturePlot(spleen, features = c("CD3", "CD4", "CD8",
                                             "CD19", "B220-CD45R", "IgD",
                                             "F4-80", "CD163", "CD68"), ncol = 3, images = c("
Rep_1"))
p2 <- SpatialFeaturePlot(spleen, features = c("CD3", "CD4", "CD8",
                                             "CD19", "B220-CD45R", "IgD",
                                             "F4-80", "CD163", "CD68"), ncol = 3, images = c("
Rep_2"))
p1 - p2
```

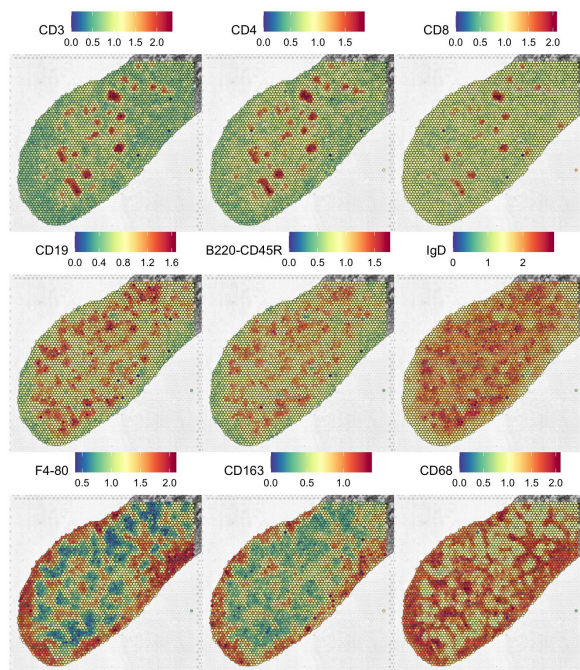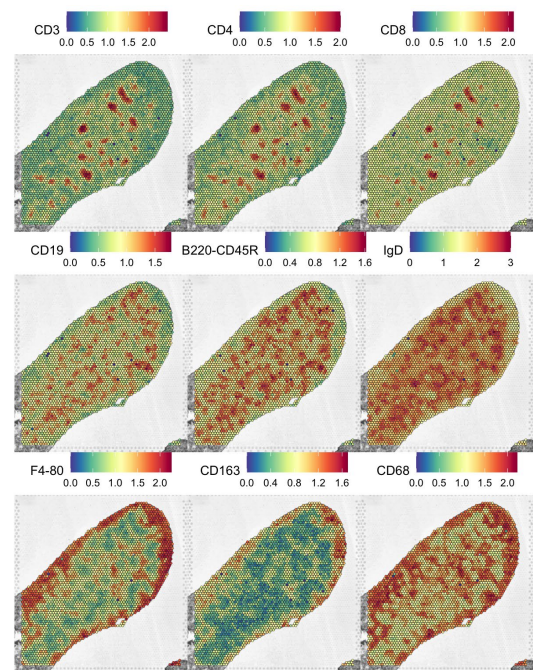

## 2. Dimensionality Reduction and Clustering

```
spleen <- RunPCA(spleen, features = rownames(spleen))
spleen <- FindNeighbors(spleen, dims = 1:10)
spleen <- FindClusters(spleen, resolution = 0.2, verbose = FALSE)
SpatialDimPlot(spleen, images = c("Rep_1", "Rep_2"))
```

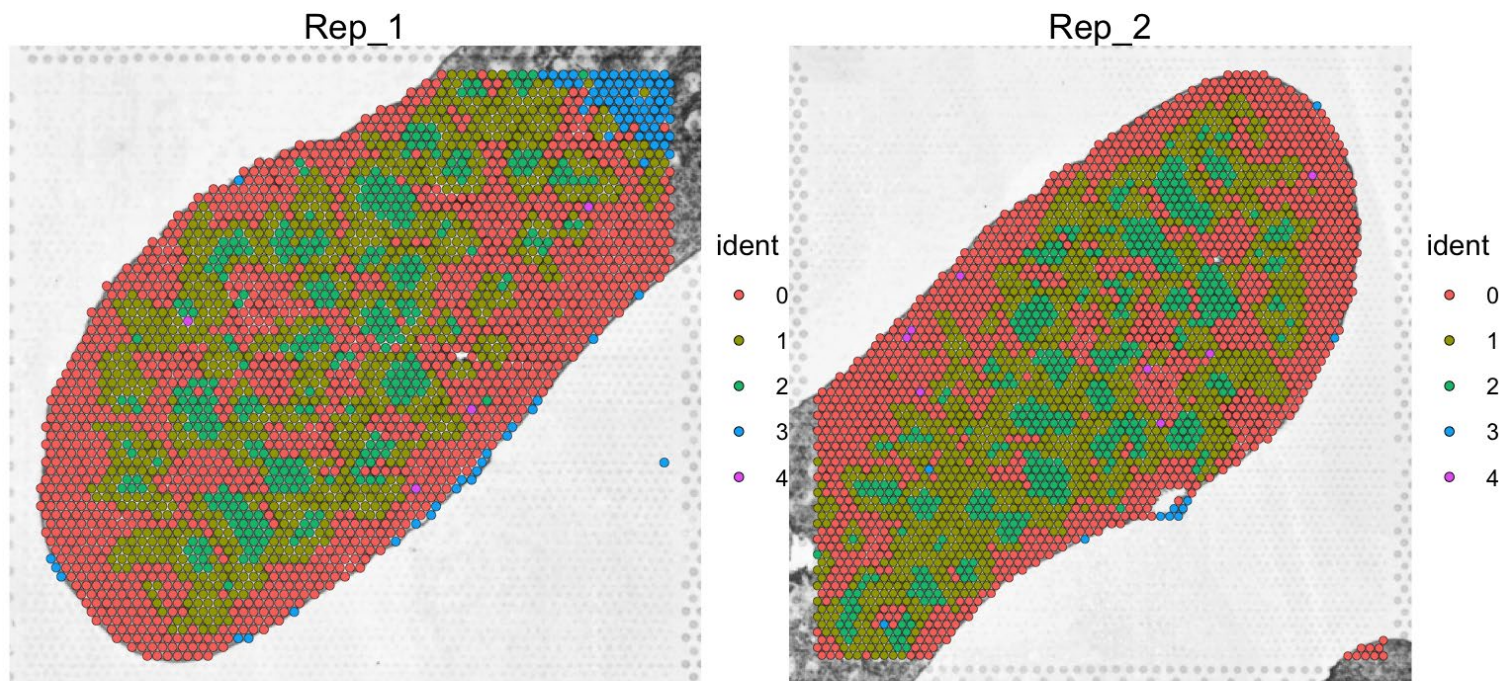

```
# Cluster 4 represents low-quality spatial barcodes  
# Cluster 3 represents epithelial enriched tissue borders  
VlnPlot(spleen, c("nCount_CITE", "nFeature_CITE", "EpCAM"))
```

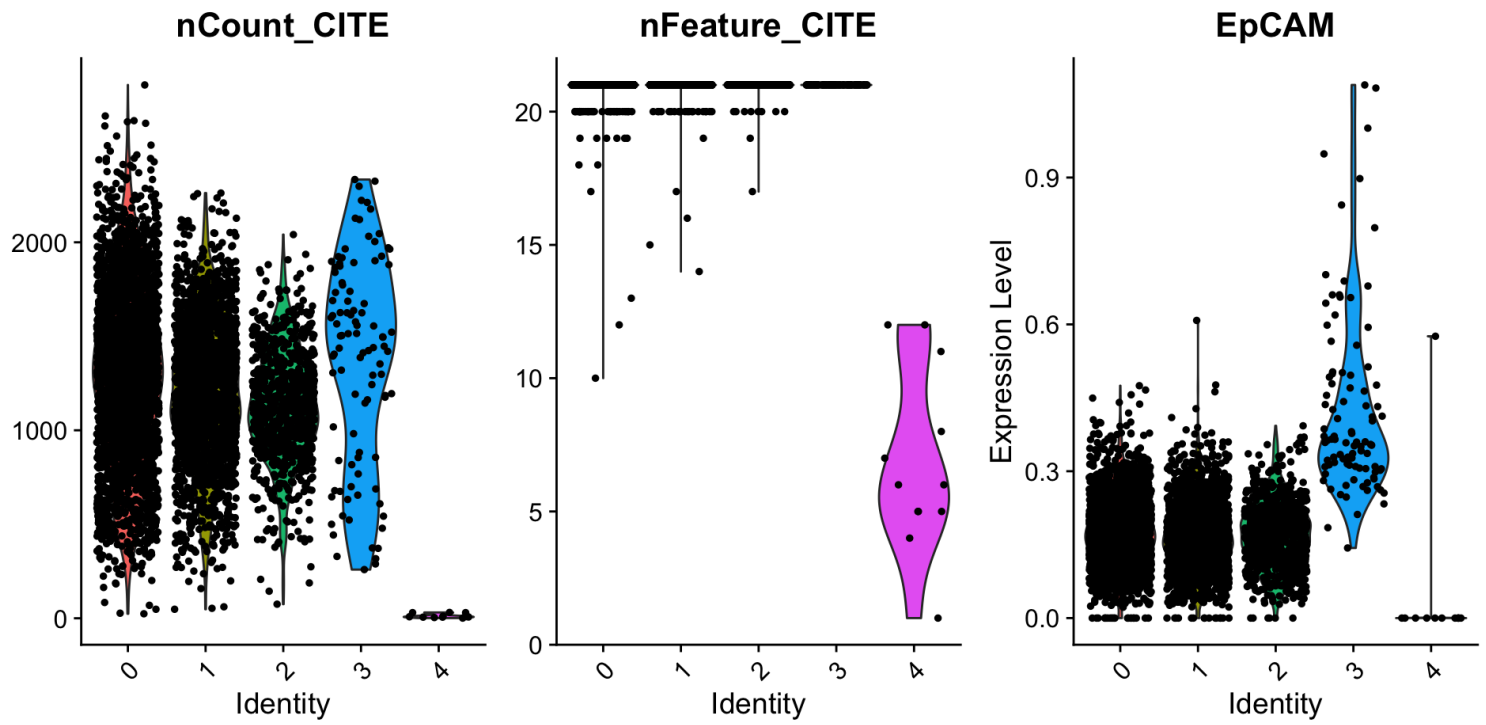

```
# rename clusters
spleen <- subset(spleen, subset = CITE_snn_res.0.2 %in% c(3,4), invert = TRUE)
spleen <- RenameIdents(spleen, '0' = "Macrophage-enriched", '1' = "B cell-enriched", '2' = "T
cell-enriched")
SpatialDimPlot(spleen, images = c("Rep_1", "Rep_2"))
```

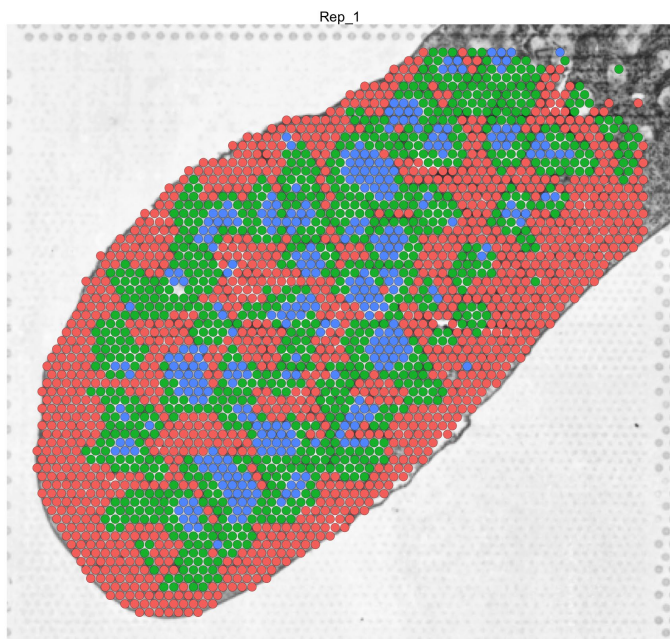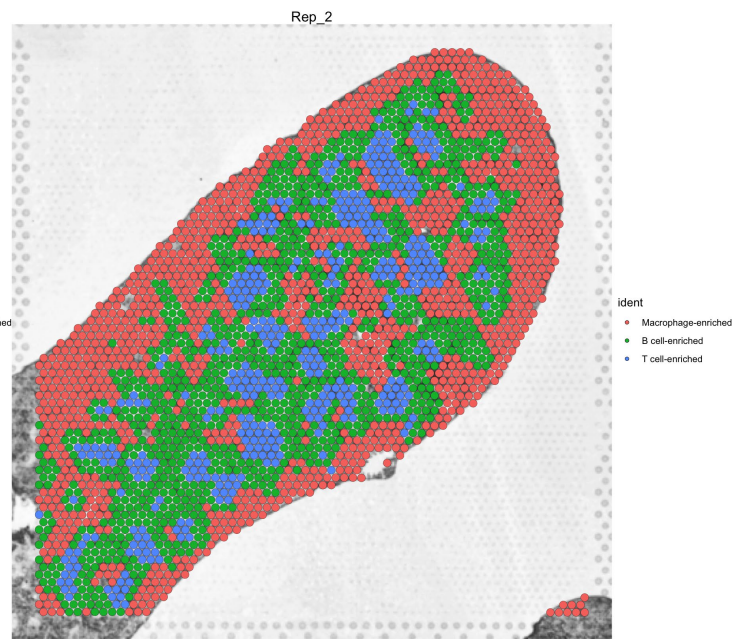

### 3. Differentially expressed ADTs

```
adt.markers <- FindAllMarkers(spleen, only.pos = TRUE, logfc.threshold = 0.2, verbose = FALSE)  
DoHeatmap(spleen, adt.markers$gene, assay = "CITE", angle = 45)
```

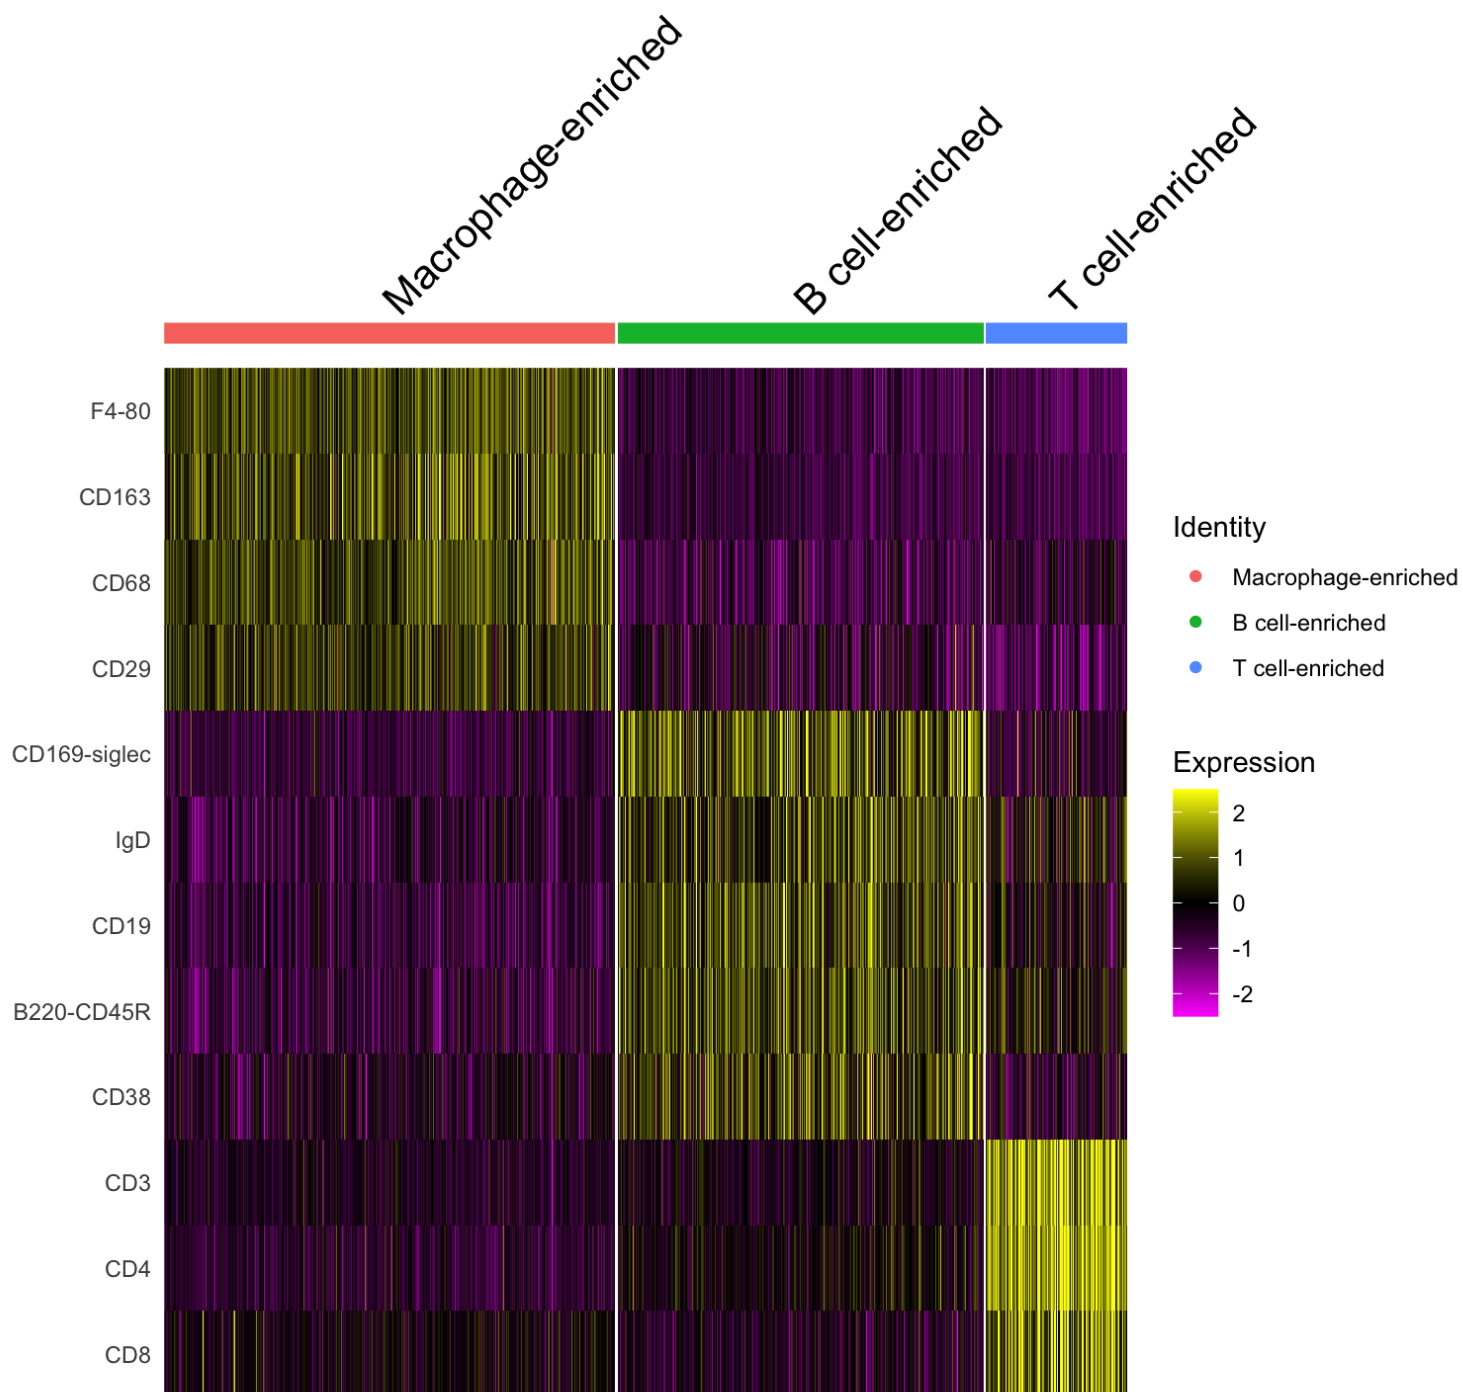

#### 4. Differentially expressed mRNAs

```
DefaultAssay(spleen) = "RNA"
mrna.markers <- FindAllMarkers(spleen, only.pos = TRUE, verbose = FALSE)
spleen.avg <- AverageExpression(spleen, assays = "RNA", return.seurat = TRUE)
DoHeatmap(spleen.avg, mrna.markers$gene, draw.lines = FALSE, assay = "RNA", angle = 45)
```

Macrophage-enriched

B cell-enriched

T cell-enriched

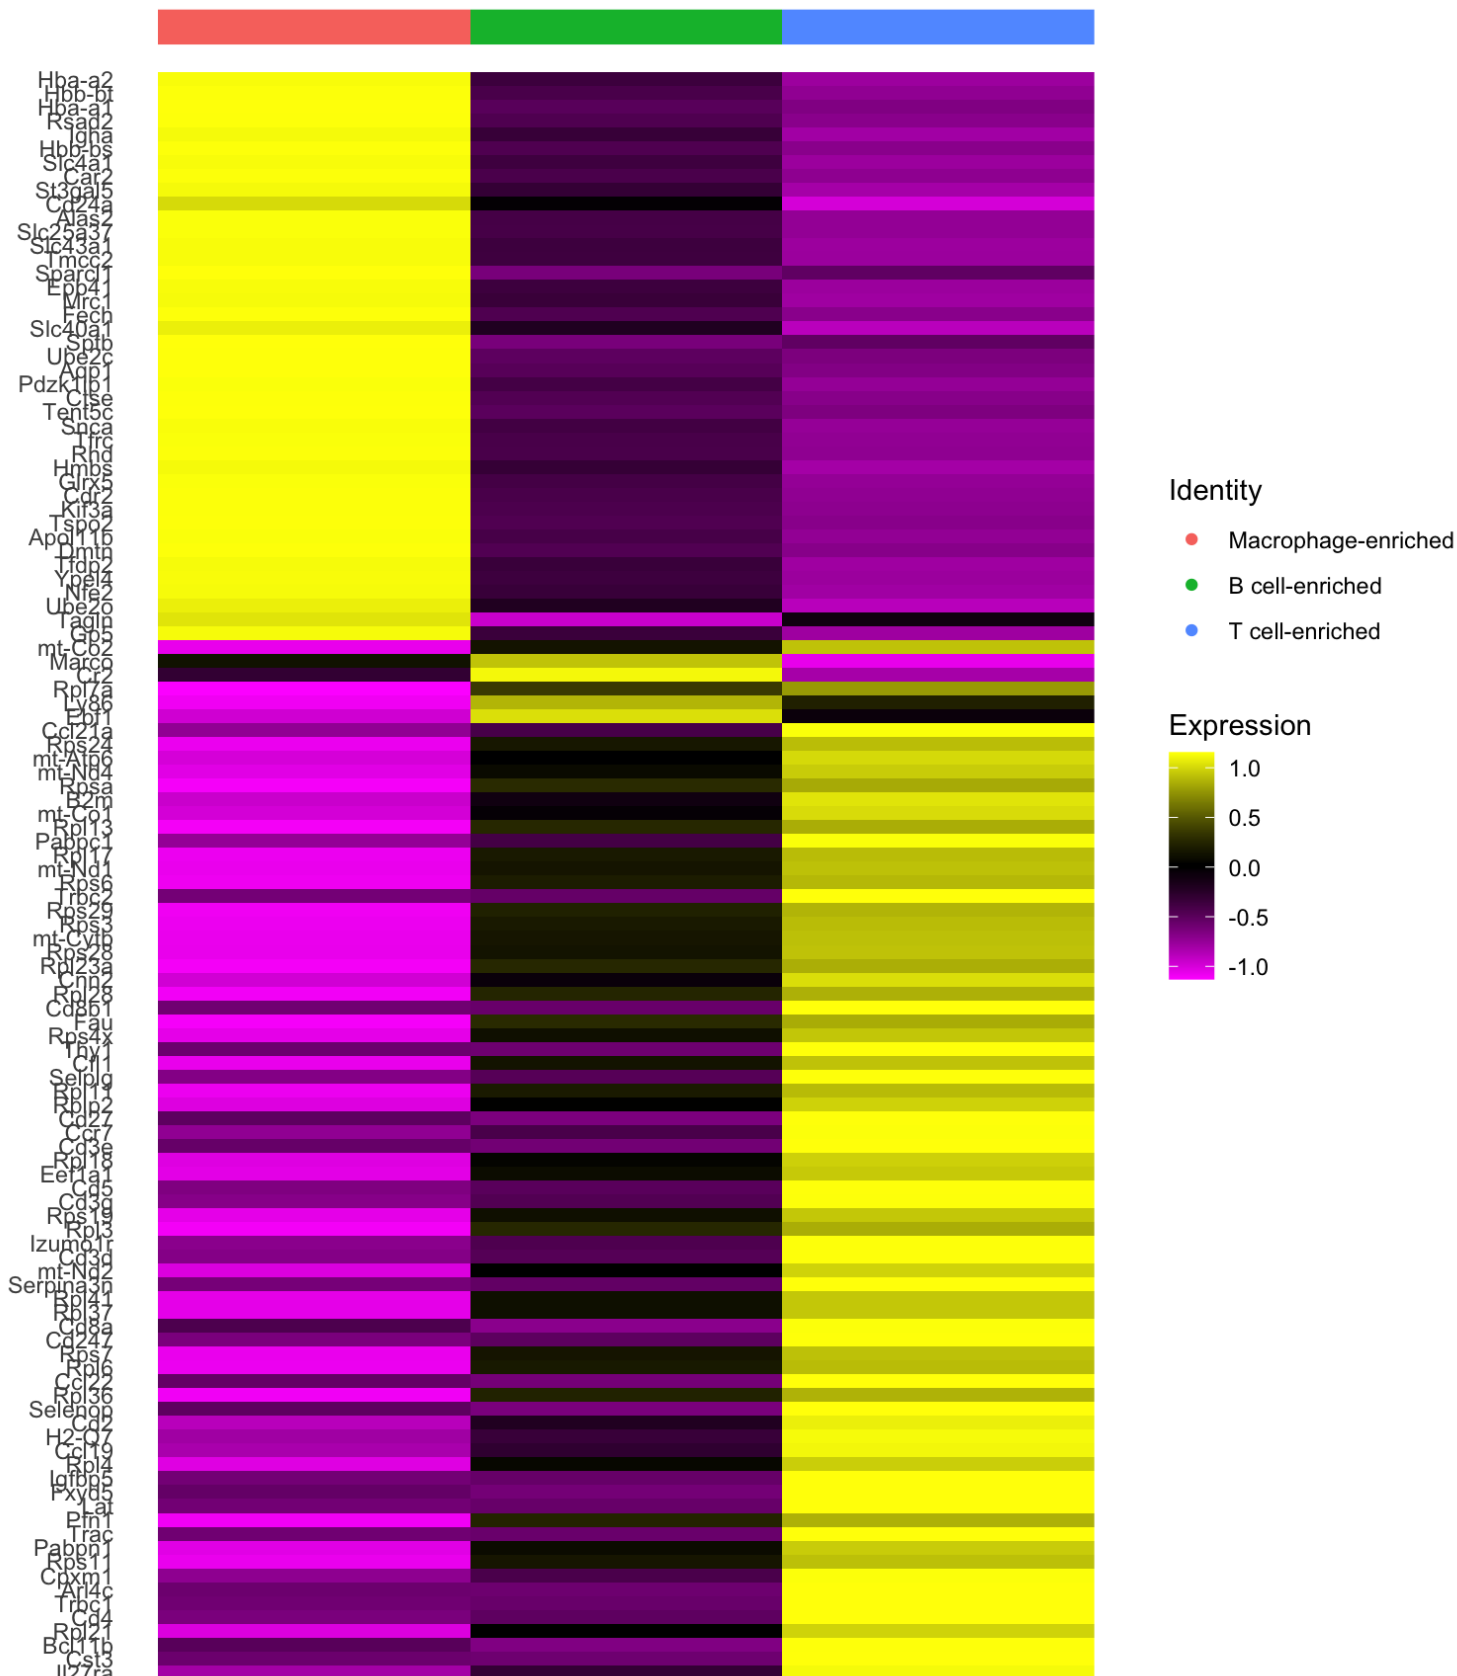



Rpk1  
 Rpk2  
 Rpk3  
 Rpk4  
 Rpk5  
 Rpk6  
 Rpk7  
 Rpk8  
 Rpk9  
 Rpk10  
 Rpk11  
 Rpk12  
 Rpk13  
 Rpk14  
 Rpk15  
 Rpk16  
 Rpk17  
 Rpk18  
 Rpk19  
 Rpk20  
 Rpk21  
 Rpk22  
 Rpk23  
 Rpk24  
 Rpk25  
 Rpk26  
 Rpk27  
 Rpk28  
 Rpk29  
 Rpk30  
 Rpk31  
 Rpk32  
 Rpk33  
 Rpk34  
 Rpk35  
 Rpk36  
 Rpk37  
 Rpk38  
 Rpk39  
 Rpk40  
 Rpk41  
 Rpk42  
 Rpk43  
 Rpk44  
 Rpk45  
 Rpk46  
 Rpk47  
 Rpk48  
 Rpk49  
 Rpk50  
 Rpk51  
 Rpk52  
 Rpk53  
 Rpk54  
 Rpk55  
 Rpk56  
 Rpk57  
 Rpk58  
 Rpk59  
 Rpk60  
 Rpk61  
 Rpk62  
 Rpk63  
 Rpk64  
 Rpk65  
 Rpk66  
 Rpk67  
 Rpk68  
 Rpk69  
 Rpk70  
 Rpk71  
 Rpk72  
 Rpk73  
 Rpk74  
 Rpk75  
 Rpk76  
 Rpk77  
 Rpk78  
 Rpk79  
 Rpk80  
 Rpk81  
 Rpk82  
 Rpk83  
 Rpk84  
 Rpk85  
 Rpk86  
 Rpk87  
 Rpk88  
 Rpk89  
 Rpk90  
 Rpk91  
 Rpk92  
 Rpk93  
 Rpk94  
 Rpk95  
 Rpk96  
 Rpk97  
 Rpk98  
 Rpk99  
 Rpk100

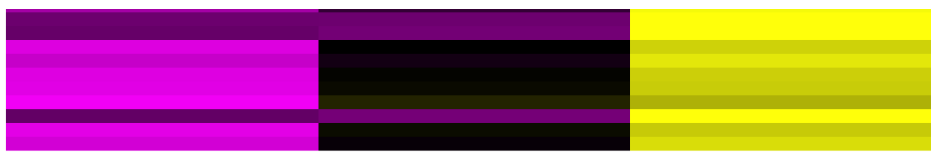

## 5. Session info

```
# Session info
print(sessionInfo())
```

```
## R version 4.0.3 (2020-10-10)
## Platform: x86_64-apple-darwin17.0 (64-bit)
## Running under: macOS Big Sur 10.16
##
## Matrix products: default
## BLAS: /Library/Frameworks/R.framework/Versions/4.0/Resources/lib/libRblas.dylib
## LAPACK: /Library/Frameworks/R.framework/Versions/4.0/Resources/lib/libRlapack.dylib
##
## locale:
## [1] en_US.UTF-8/en_US.UTF-8/en_US.UTF-8/C/en_US.UTF-8/en_US.UTF-8
##
## attached base packages:
## [1] stats graphics grDevices utils datasets methods base
##
## other attached packages:
## [1] SeuratObject_4.0.0 Seurat_4.0.1
##
## loaded via a namespace (and not attached):
## [1] nlme_3.1-151 spatstat.sparse_2.0-0 matrixStats_0.57.0 bit64_4.0.5
## RcppAnnoy_0.0.18 RColorBrewer_1.1-2
## [7] httr_1.4.2 sctransform_0.3.2 tools_4.0.3 R6_2.5.0
## irlba_2.3.3 rpart_4.1-15
## [13] KernSmooth_2.23-18 uwot_0.1.10 mgcv_1.8-33 DBI_1.1.0
## lazyeval_0.2.2 colorspace_2.0-0
## [19] withr_2.4.3 tidyselect_1.1.0 gridExtra_2.3 bit_4.0.4
## compiler_4.0.3 hdf5r_1.3.5
## [25] plotly_4.9.2.2 labeling_0.4.2 scales_1.1.1 lmtest_0.9-38
## spatstat.data_1.7-0 ggribes_0.5.3
## [31] pbapply_1.4-3 goftest_1.2-2 stringr_1.4.0 digest_0.6.27
## spatstat.utils_2.1-0 rmarkdown_2.6
## [37] pkgconfig_2.0.3 htmltools_0.5.2 parallelly_1.23.0 limma_3.46.0
## fastmap_1.1.0 htmlwidgets_1.5.3
## [43] rlang_0.4.10 shiny_1.5.0 farver_2.0.3 generics_0.1.0
## zoo_1.8-8 jsonlite_1.7.2
## [49] ica_1.0-2 dplyr_1.0.2 magrittr_2.0.1 patchwork_1.1.1
## Matrix_1.3-2 Rcpp_1.0.7
## [55] munsell_0.5.0 abind_1.4-5 reticulate_1.18 lifecycle_0.2.0
## stringi_1.5.3 yaml_2.2.1
## [61] MASS_7.3-53 Rtsne_0.15 plyr_1.8.6 grid_4.0.3
## parallel_4.0.3 listenv_0.8.0
## [67] promises_1.1.1 ggrepel_0.9.0 crayon_1.3.4 deldir_0.2-3
## miniUI_0.1.1.1 lattice_0.20-41
```

```
## [73] cowplot_1.1.1          splines_4.0.3          tensor_1.5             knitr_1.30
pillar_1.4.7                igraph_1.2.6
## [79] spatstat.geom_1.65-5    future.apply_1.7.0     reshape2_1.4.4        codetools_0.2-18
leiden_0.3.6                glue_1.4.2
## [85] evaluate_0.14           data.table_1.13.6     vctrs_0.3.6           png_0.1-7
httpuv_1.5.4                polyclip_1.10-0
## [91] gtable_0.3.0            RANN_2.6.1            purrr_0.3.4           spatstat.core_1.65-
5 tidyr_1.1.2              scattermore_0.7
## [97] future_1.21.0           ggplot2_3.3.3         xfun_0.20             mime_0.9
xtable_1.8-4                later_1.1.0.1
## [103] survival_3.2-7         viridisLite_0.3.0     tibble_3.0.4          cluster_2.1.0
globals_0.14.0             fitdistrplus_1.1-3
## [109] ellipsis_0.3.1        ROCR_1.0-11
```

---

1. Tri-Institutional Training Program in Computational Biology and Medicine, [xin2001@med.cornell.edu](mailto:xin2001@med.cornell.edu)↔
