# Supplementary material
Source: PubMed Central journal article supplement (PMC10272089)
Supplement: NIHMS1878650-supplement-Supp_Note_3.pdf [file NIHMS1878650-supplement-Supp_Note_3.pdf]

# Supplementary Note SPOTS analysis of murine breast cancer

Steve X. Niu<sup>1</sup>

Last Run: July 29, 2022

1. Load Data This markdown file contains the scRNA-seq analysis for the paper titled **Integrated protein and transcriptome high-throughput spatial profiling**. The data used for this analysis can be found under the GEO repository GSE198353.

```
# install Seurat v4.0.0 and spots
if (!requireNamespace("remotes", quietly = TRUE))
  install.packages("remotes")
if (!requireNamespace("Seurat", quietly = TRUE) | utils::packageVersion("Seurat") < "4.0.0")
  remotes::install_version("Seurat", version = "4.0.0")
if (!requireNamespace("spots", quietly = TRUE))
  install.packages("spots")

# load data
library(Seurat)
library(spots)

mmtv_gex <- Read10X_h5('GSE198353_mmtv_pynt_GEX_filtered_feature_bc_matrix.h5')
mmtv_adt <- read.csv('GSE198353_mmtv_pynt_ADT.csv.gz', header = TRUE, row.names = 1, check.names = FALSE)
mmtv_image <- Read10X_Image('GSE198353_mmtv_pynt_spatial')
mmtv <- CreateSeuratObject(mmtv_gex, assay = "RNA", project = "MMTV")
mmtv_adt <- CreateSeuratObject(mmtv_adt, assay = "CITE", project = "MMTV")
mmtv@assays$CITE <- mmtv_adt@assays$CITE
mmtv$nCount_CITE <- mmtv_adt$nCount_CITE
mmtv$nFeature_CITE <- mmtv_adt$nFeature_CITE
mmtv_image@key <- "A"
mmtv@images <- list(A = mmtv_image)
SpatialDimPlot(mmtv)
```

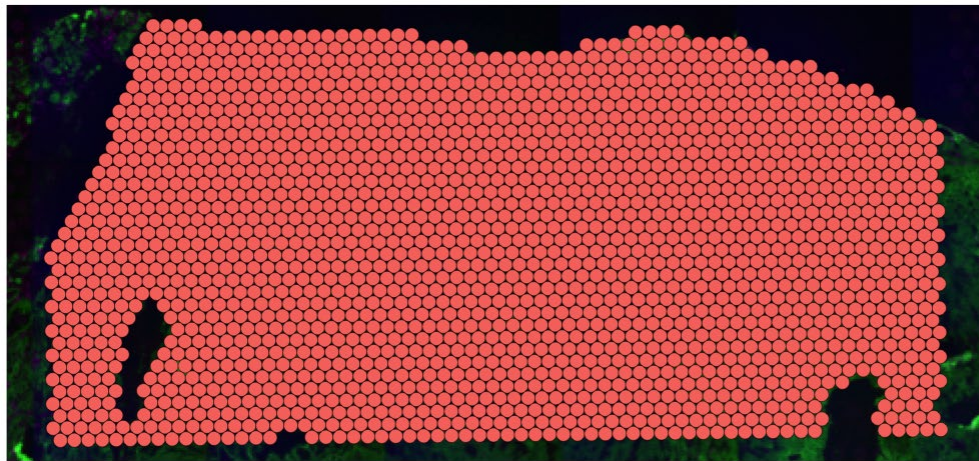

ident

● MMTV

## 2. Data normalization

```
mmtv <- NormalizeData(mmtv, assay = "RNA", verbose = FALSE)
mmtv <- NormalizeData(mmtv, assay = "CITE", verbose = FALSE)
DefaultAssay(mmtv) <- "CITE"
mmtv <- ScaleData(mmtv, verbose = FALSE)
SpatialFeaturePlot(mmtv, features = c("CD326", "Podoplanin", "I-A/I-E",
                                     "F4/80", "CD11c", "CD4"), ncol = 3, min.cutoff = "q25")
```

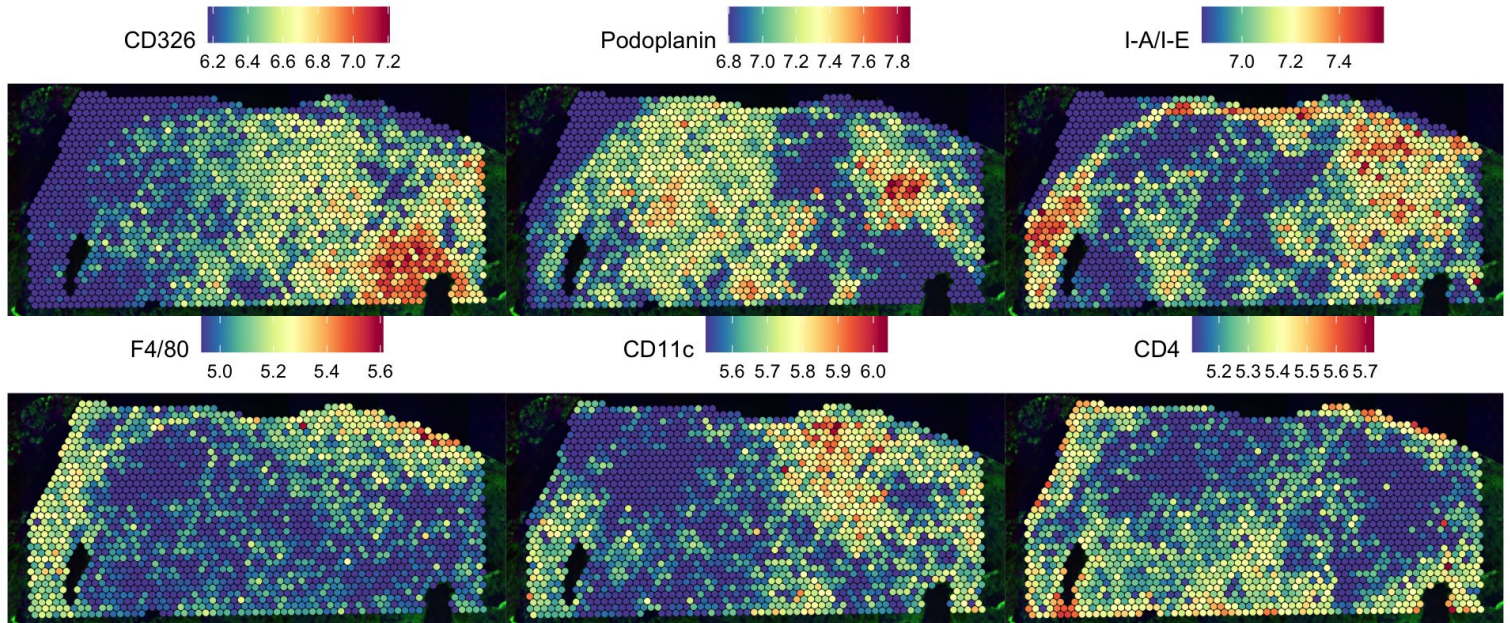

## 2. Spatial Component Analysis and Clustering

```

Visium.hnn.dist <- LoadData("~/Downloads", "Visium.HNN")
mmtv.hnn.dist <- VisiumHnn("~/Downloads/", Cells(mmtv))
mmtv.hnn <- HnnNeighbor(mmtv.hnn.dist, k = 37, include.self = FALSE)
mmtv.hnn.weight <- HnnWeight(mmtv.hnn$dist.mat, dist.k = 3, sigma = 1)
mmtv.sca <- SCA(X = Matrix::t(mmtv@assays$CITE@data),
               W = mmtv.hnn.weight,
               scaled.data = t(mmtv@assays$CITE@scale.data),
               n.eigen = 30)
mmtv@reductions[["sca"]] <- CreateDimReducObject(embeddings = mmtv.sca$X,
                                                loadings = mmtv.sca$rotation,
                                                stdev = mmtv.sca$eigenvalues,
                                                key = "SC_", assay = "CITE")
mmtv <- FindNeighbors(mmtv, reduction = "sca", dims = 1:15)
mmtv <- FindClusters(mmtv, resolution = 0.3)

```

```
## Modularity Optimizer version 1.3.0 by Ludo Waltman and Nees Jan van Eck
```

```
##  
## Number of nodes: 1978  
## Number of edges: 72438  
##  
## Running Louvain algorithm...  
## Maximum modularity in 10 random starts: 0.8278  
## Number of communities: 5  
## Elapsed time: 0 seconds
```

```
mmtv <- RenameIdents(mmtv, '0' = 'Fibroblast-high',  
                        '1' = 'Fibroblast-low',  
                        '2' = 'M2-MF',  
                        '3' = 'Immune-enriched (Peritumor)',  
                        '4' = 'M1-MF')  
  
mmtv@active.ident = factor(mmtv@active.ident, levels = c('Fibroblast-high', 'Fibroblast-low', '  
M1-MF',  
                                                        'M2-MF', 'Immune-enriched (Peritumor)'  
))  
SpatialDimPlot(mmtv, label = TRUE, repel = TRUE)
```

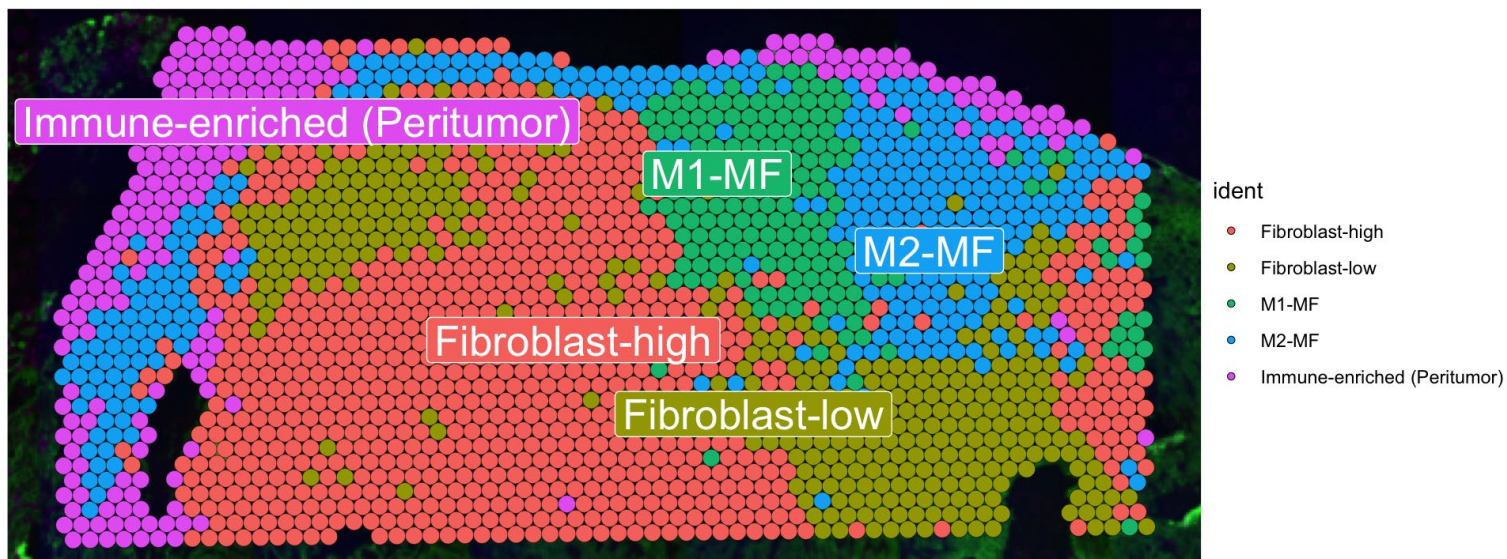

### 3. Differentially expressed ADTs

```
adt.markers <- FindAllMarkers(mmtv, only.pos = TRUE, logfc.threshold = 0.2, verbose = FALSE)  
DoHeatmap(mmtv, adt.markers$gene, assay = "CITE", angle = 45)
```

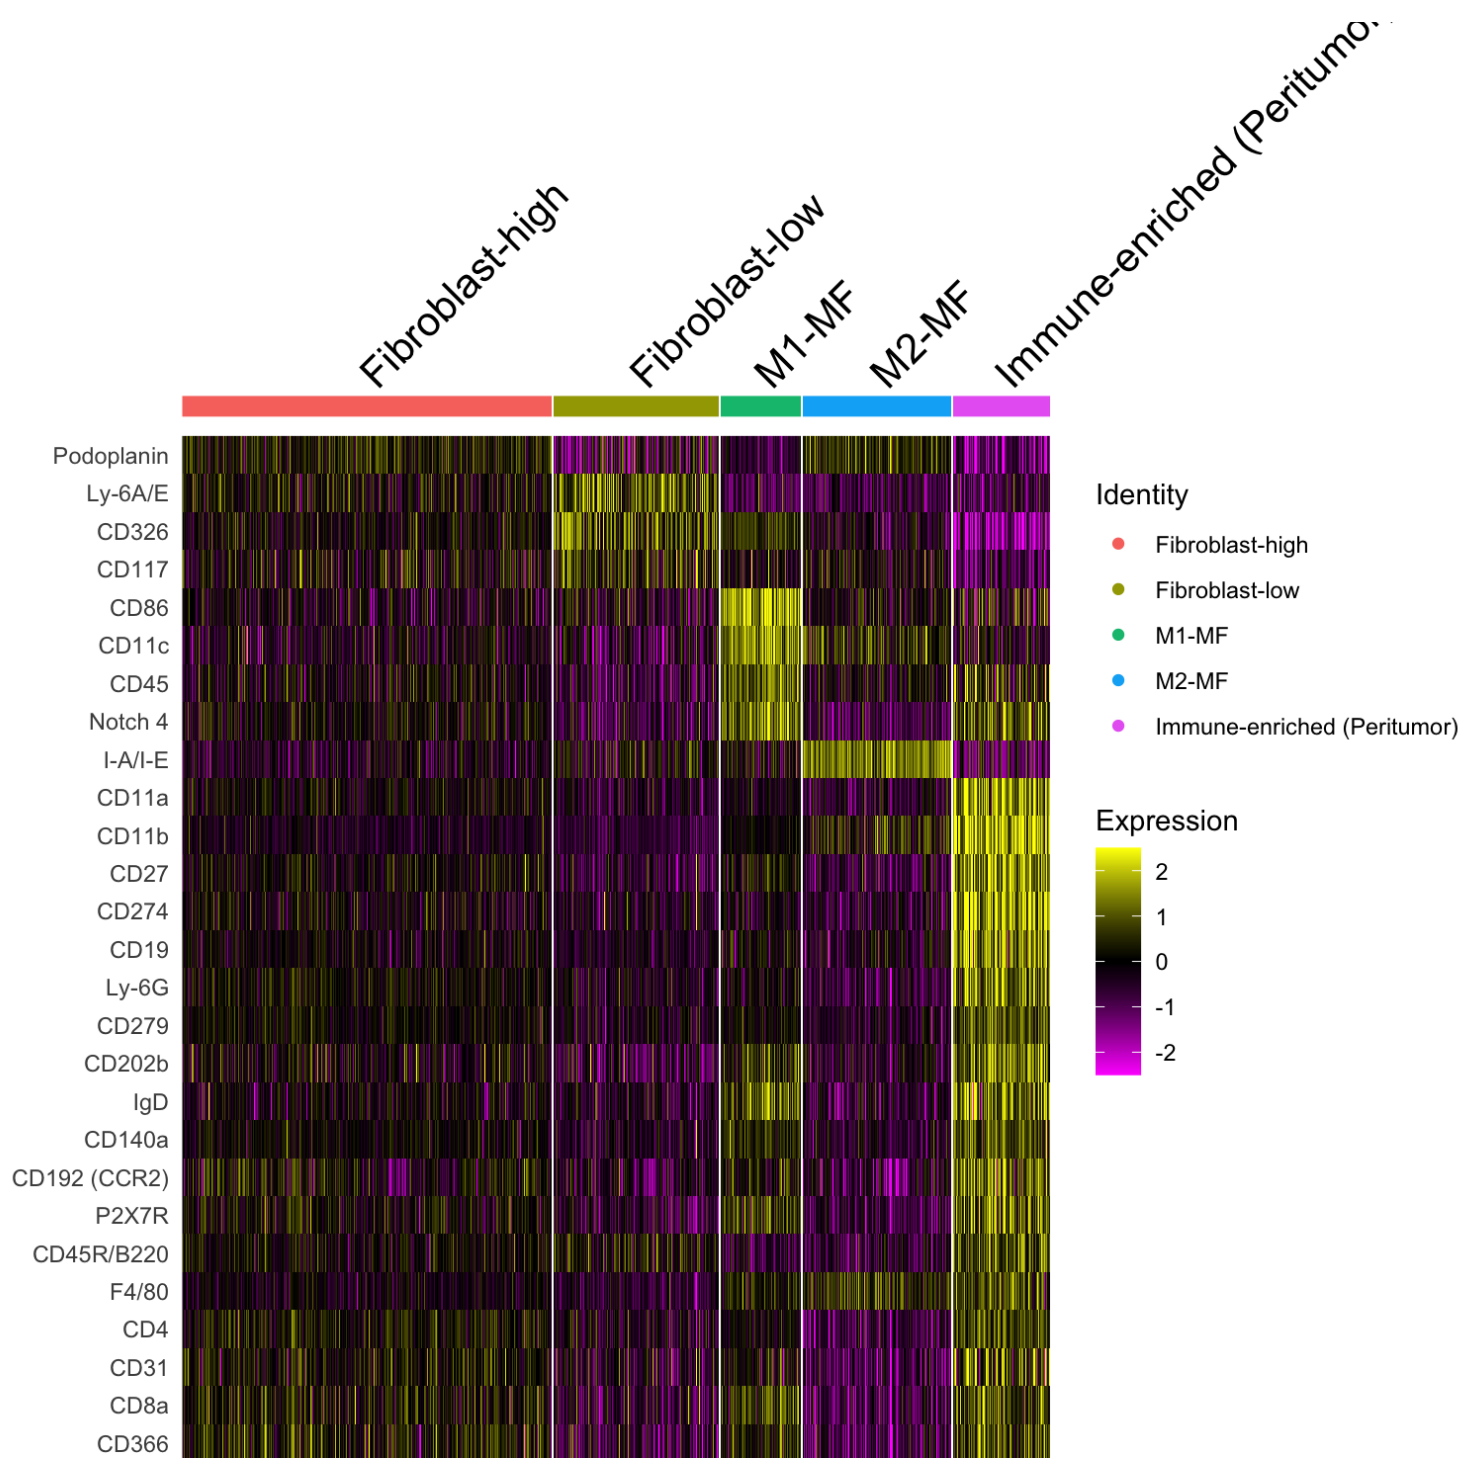

#### 4. Differentially expressed mRNAs

```
DefaultAssay(mmtv) = "RNA"
mrna.markers <- FindAllMarkers(mmtv, only.pos = TRUE, verbose = FALSE)
mmtv.avg <- AverageExpression(mmtv, assays = "RNA", return.seurat = TRUE)
DoHeatmap(mmtv.avg, mrna.markers$gene, draw.lines = FALSE, assay = "RNA", angle = 45)
```

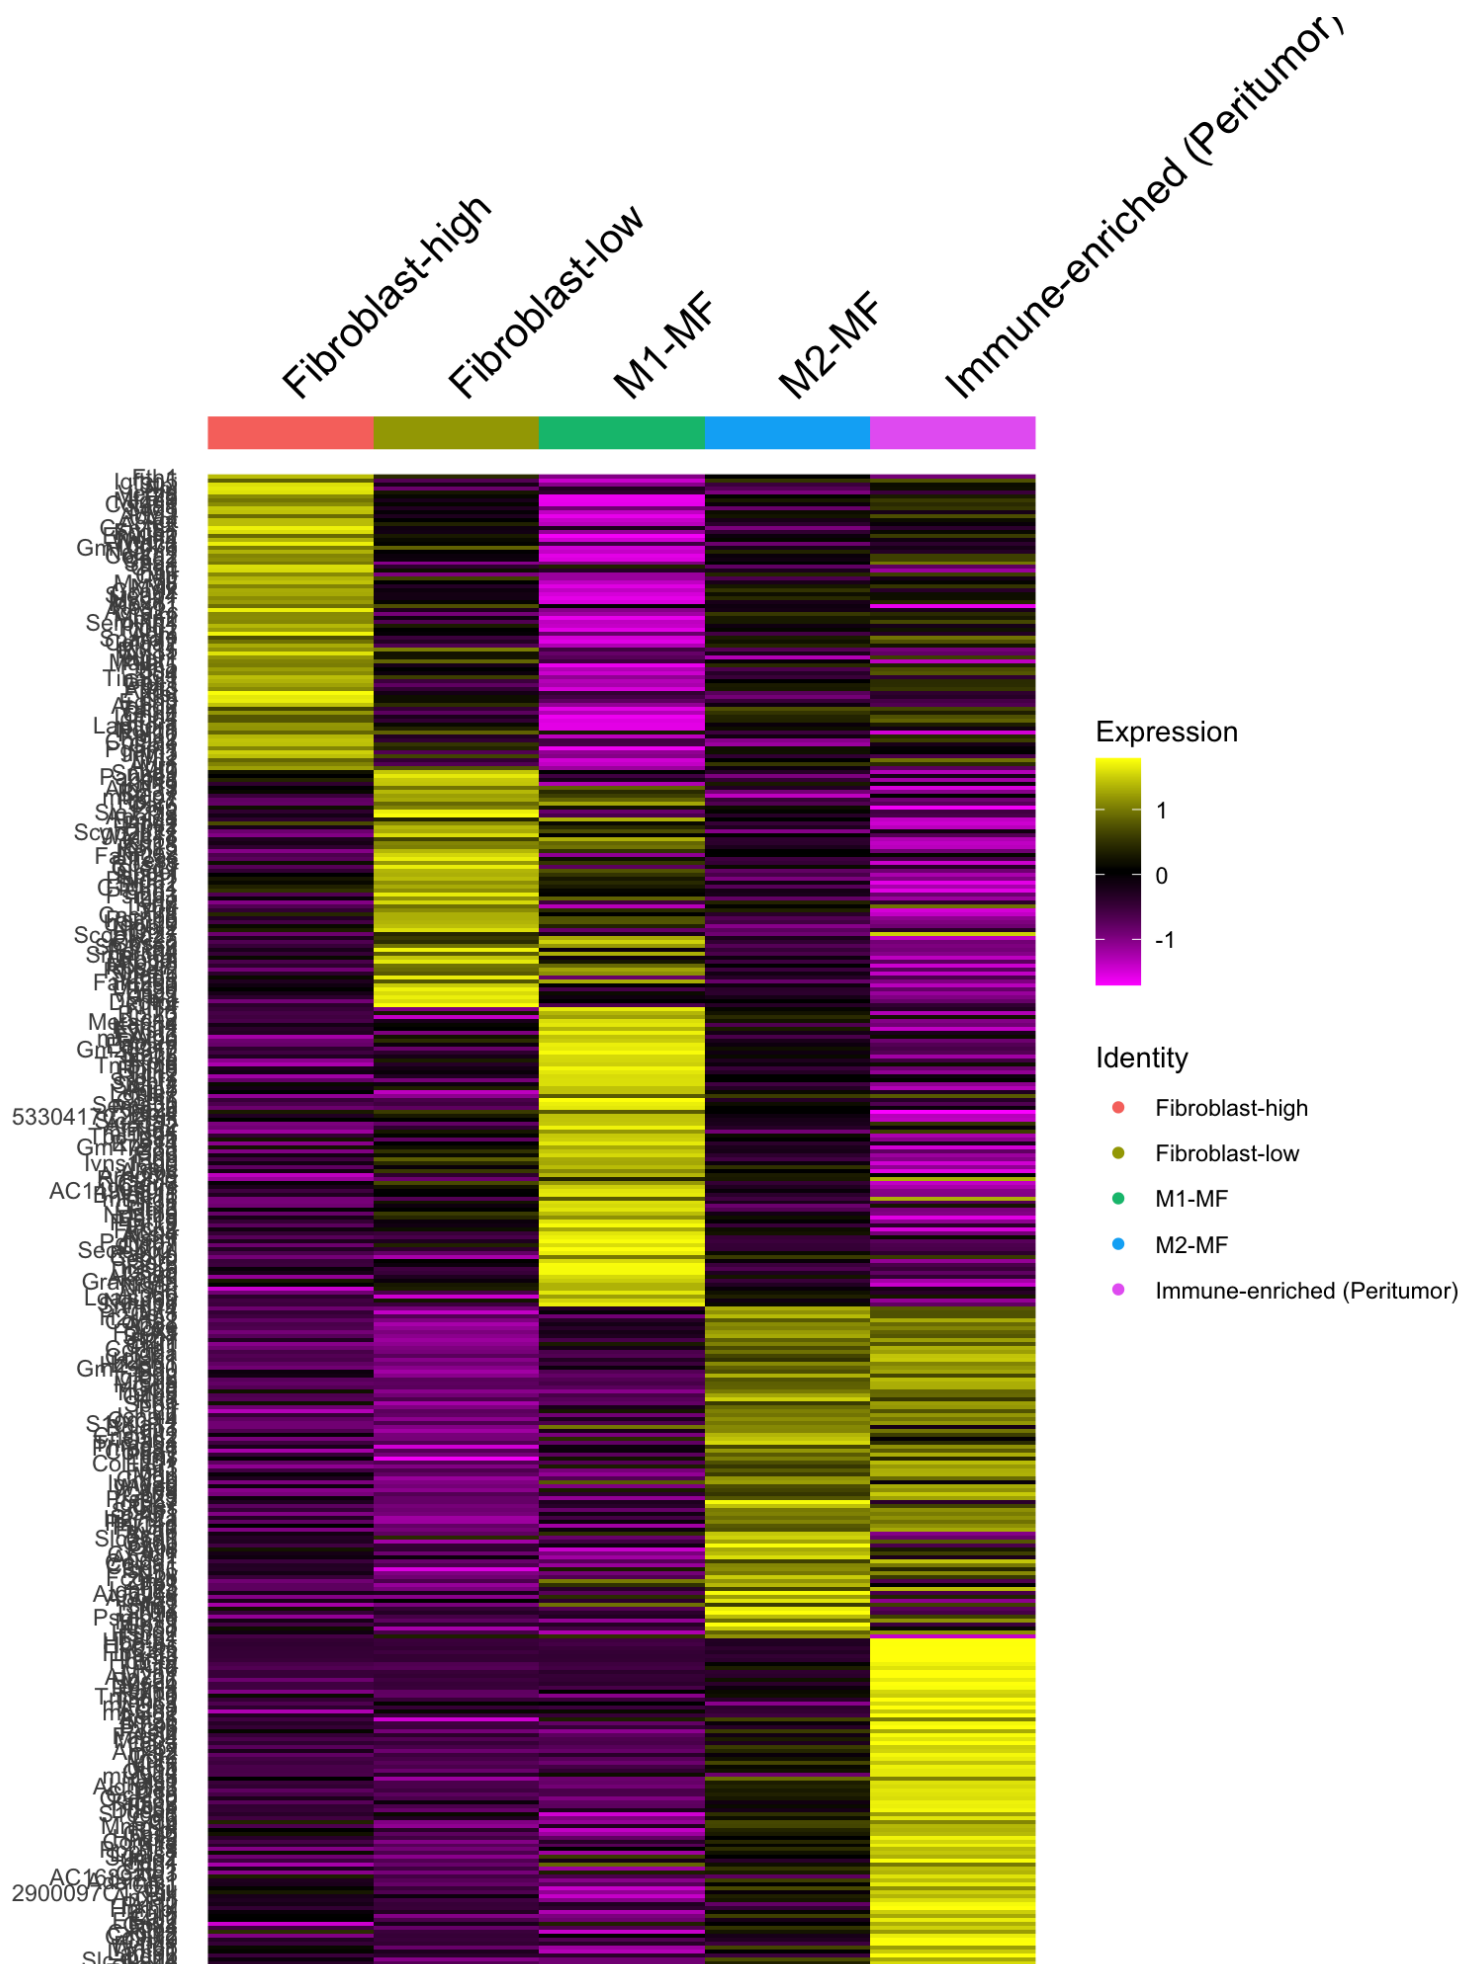

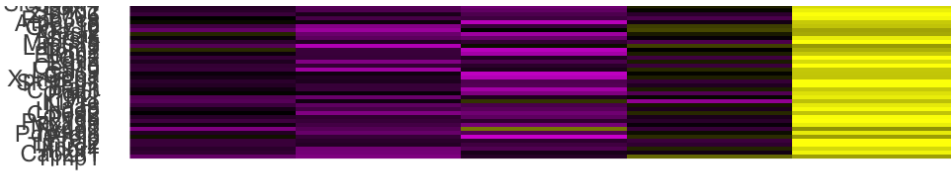

## 5. Session info

```
# Session info
```

```
print(sessionInfo())
```

```
## R version 4.0.3 (2020-10-10)
## Platform: x86_64-apple-darwin17.0 (64-bit)
## Running under: macOS Big Sur 10.16
##
## Matrix products: default
## BLAS: /Library/Frameworks/R.framework/Versions/4.0/Resources/lib/libRblas.dylib
## LAPACK: /Library/Frameworks/R.framework/Versions/4.0/Resources/lib/libRlapack.dylib
##
## locale:
## [1] en_US.UTF-8/en_US.UTF-8/en_US.UTF-8/C/en_US.UTF-8/en_US.UTF-8
##
## attached base packages:
## [1] stats graphics grDevices utils datasets methods base
##
## other attached packages:
## [1] spots_0.1.0 SeuratObject_4.0.0 Seurat_4.0.1
##
## loaded via a namespace (and not attached):
## [1] Rtsne_0.15 colorspace_2.0-0 deldir_0.2-3 ellipsis_0.3.2
ggridges_0.5.3 rstudioapi_0.13
## [7] spatstat.data_1.7-0 farver_2.0.3 leiden_0.3.6 listenv_0.8.0
remotes_2.4.2 bit64_4.0.5
## [13] ggrepel_0.9.0 RSpectra_0.16-0 codetools_0.2-18 splines_4.0.3
knitr_1.38 polyclip_1.10-0
## [19] jsonlite_1.7.2 ica_1.0-2 cluster_2.1.0 png_0.1-7
uwot_0.1.10 shiny_1.5.0
## [25] sctransform_0.3.2 spatstat.sparse_2.0-0 compiler_4.0.3 httr_1.4.2
Matrix_1.3-2 fastmap_1.1.0
## [31] lazyeval_0.2.2 limma_3.46.0 cli_3.2.0 later_1.1.0.1
htmltools_0.5.2 tools_4.0.3
## [37] igraph_1.2.6 gtable_0.3.0 glue_1.6.2 RANN_2.6.1
reshape2_1.4.4 dplyr_1.0.2
## [43] Rcpp_1.0.7 scattermore_0.7 jquerylib_0.1.3 vctrs_0.4.1
nlme_3.1-151 lmtest_0.9-38
## [49] xfun_0.30 stringr_1.4.0 globals_0.14.0 mime_0.9
miniUI_0.1.1.1 lifecycle_1.0.1
## [55] irlba_2.3.3 goftest_1.2-2 future_1.21.0 MASS_7.3-53
zoo_1.8-8 scales_1.1.1
## [61] spatstat.core_1.65-5 promises_1.1.1 spatstat.utils_2.1-0 parallel_4.0.3
RColorBrewer_1.1-2 yaml_2.2.1
## [67] reticulate_1.18 pbapply_1.4-3 gridExtra_2.3 ggplot2_3.3.3
sass_0.4.0 rpart_4.1-15
```



```
## [73] stringi_1.5.3          highr_0.8          rlang_1.0.2        pkgconfig_2.0.3
      matrixStats_0.57.0     evaluate_0.15
## [79] lattice_0.20-41         ROCR_1.0-11       purrr_0.3.4        tensor_1.5
      labeling_0.4.2         patchwork_1.1.1
## [85] htmlwidgets_1.5.3       bit_4.0.4          cowplot_1.1.1      tidyselect_1.1.0
      parrelly_1.23.0        RcppAnnoy_0.0.18
## [91] plyr_1.8.6              magrittr_2.0.1    R6_2.5.0           generics_0.1.0
      DBI_1.1.0              mgcv_1.8-33
## [97] pillar_1.4.7            fitdistrplus_1.1-3 survival_3.2-7      abind_1.4-5
      tibble_3.0.4           future.apply_1.7.0
## [103] hdf5r_1.3.5             crayon_1.3.4       KernSmooth_2.23-18 spatstat.geom_1.65-
5 plotly_4.9.2.2          rmarkdown_2.13
## [109] grid_4.0.3              data.table_1.13.6 digest_0.6.27      xtable_1.8-4
      tidyr_1.1.2            httpuv_1.5.4
## [115] munsell_0.5.0          viridisLite_0.3.0 bslib_0.3.1
```

1. Tri-Institutional Training Program in Computational Biology and Medicine, [xin2001@med.cornell.edu](mailto:xin2001@med.cornell.edu)↔
